# Supplementary material for: Characterizing rockfall hazard with an integrated kinematic analysis and runout model: Skagway, Alaska, USA
Source: Copernicus journal article supplement (doi:10.5194/egusphere-2025-1168), 2025-04-01
Supplement: Supplementary file [file egusphere-2025-1168-RC2-supplement.pdf]

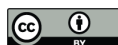

# Characterizing rockfall hazard with an integrated kinematic analysis and runout model: Skagway, Alaska, USA

Ian D. Wachino<sup>1</sup>, Joshua J. Roering<sup>1</sup>, Reuben Cash<sup>2</sup>, and Annette I. Patton<sup>3, 4</sup>

<sup>1</sup>Department of Earth Sciences, University of Oregon, Eugene, OR, 97403, USA

<sup>2</sup>Environmental Department, Skagway Traditional Council, Skagway, AK, 99840, USA

<sup>3</sup>Sitka Sound Science Center, Sitka, AK, 99835, USA

<sup>4</sup>College of Forestry, Oregon State University, Corvallis, OR, 97331, USA

*Corresponding author:* Joshua J. Roering (jroering@uoregon.edu)

## Abstract

Rockfall is common in steep terrain and poses a hazard to nearby communities. While rockfall triggering mechanisms are highly variable and difficult to quantify, the susceptibility of rock slopes to planar, wedge, or toppling failure can be readily assessed using kinematic analysis. As such, valley slopes with favourable joint orientations exhibit high rockfall susceptibility although the potential for rockfall runout to impact infrastructure and public safety depends on the morphology of downslope terrain. Integrating rockfall susceptibility and runout models with maps of talus deposits accumulated from past rockfall events is an effective combination of tools to inform mitigation but can be difficult to realize across extensive areas. Here, we combine these methods with a historic rockfall inventory to assess rockfall hazard in the steep and forested postglacial valleys proximal to Skagway, AK, where recent rockfall activity has imperilled public safety, infrastructure, and tourism. Our field investigations identified two steeply dipping orthogonal joint sets that favour toppling failure along NW-facing hillslopes in the lower Skagway River valley as well as the NW-facing valleys that bound nearby Dyea Bay and Nahku Bay. We used new and existing lidar data and >300 field-derived joint orientations to inform a kinematic toppling failure model that identifies likely zones of rock toppling. The predicted source zones are positioned upslope of abundant talus slopes that we mapped from field observations and lidar analyses. Along the prominent ridgeline on the eastern margin of Skagway, we used RAMMS:Rockfall to model nearly 200,000 rockfall runout events for four scenarios that account for variations in clast size and ground cover. The runout predictions highlight distinct zones of low and high rockfall hazard along the ridgeline that result from changes in hillslope morphology set by the combined influence of joint orientations and the pattern of glacial erosion. High-hazard segments of the ridgeline exhibit distinct bedrock escarpments and slope-spanning talus slopes that result from the accumulation of rockfall activity over millennia. Our findings reveal controls on past and future rockfall activity and can be used to inform mitigative measures.

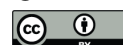

## 1 Introduction

In steep, rocky landscapes, the detachment and downslope movement of discrete rock fragments can occur frequently and poses a significant hazard to proximal communities and infrastructure (Hungr et al., 2014). Rockfall activity has been attributed to an array of highly disparate conditioning and triggering processes, including precipitation, frost weathering, insolation, seismic activity, and slope modification (Collins and Stock, 2016; Rosser and Massey, 2022). In Yosemite Valley, CA, for example, rockfall triggers include rainfall events, snow melt, and freeze-thaw action that can increase pressure along joints (Stock et al., 2011; Wieczorek and Jäger, 1996). Furthermore, rockfalls in Yosemite Valley may also be triggered on warm summer days by cyclic solar heating, which can propagate exfoliation fractures and lead to detachment (Collins and Stock, 2016). Despite significant progress in characterizing these and other rockfall triggering mechanisms, prediction of rockfall timing and location has limited ability to inform warning systems (Rosser and Massey, 2022). Precursory rock deformation can signal future activity (Abellán et al., 2010; Rosser et al., 2007; Royán et al., 2014), but current methods to quantify precursor deformation across extensive areas composed of steep, high-relief surfaces are limited and oftentimes rockfall occurs without prior deformation (Abellán et al., 2011). As a result, identifying rock slopes with the propensity to generate rockfall, often referred to as rockfall source areas, is a key first step in mitigating rockfall hazards.

A wide array of methods has been proposed to assess the extent to which hillslopes are prone to rockfall activity. Delineating potential source zones (e.g., Loye et al., 2009) can be accomplished from direct observation of past events, which assumes the location of past detachments coincides with the location of future rockfall activity (Luckman, 1976; Matsuoka and Sakai, 1999; Rapp, 1960; Whalley, 1984). Source zones can also be inferred from distinctive evidence such as talus slope and scree deposits that have accumulated below cliff faces (Borella et al., 2019; Frattini et al., 2008; Moore et al., 2009; Stock and Collins, 2014). Coupled assessment of rock slope morphology and the properties of potential source zones is another common approach that uses digital elevation models (DEMs) for assessing source zones over large areas (Frattini et al., 2008; Guzzetti et al., 2003; Messenzehl et al., 2017; Samodra et al., 2016), while more data-intensive and physically-based deformation models can be used for slope-scale analyses (Matasci et al., 2018). In absence of rock structure data, some studies (e.g., Guerriero et al., 2024) have applied morphologic criteria (e.g., slope and curvature thresholds) to DEMs to identify anomalous rock slope protrusions that are likely to experience rockfall events (Aksoy and Ercanoglu, 2006; Frattini et al., 2008; Guzzetti et al., 2003; Marquínez et al., 2003; Sarro et al., 2024)

Because rockfall is typically localized along bedding planes, fractures, or joints, collectively referred to as discontinuities, susceptibility can also be evaluated by determining the geometry of these planes of weakness with respect to the slope and orientation of rock slopes. Kinematic analysis identifies blocks that can experience instability according to sliding, toppling, or wedge failure criteria as determined by the geometry of rock slopes and discontinuities (Fig. 1) (Bovis and Evans, 1996; Wyllie and Mah, 2004). Combining high-resolution DEMs with rock structure data can inform kinematic analyses and

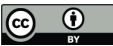

determine the relative likelihood of different failure modes across expansive areas (Grant et al., 2016; Kundu et al., 2023; Stock and Collins, 2014). Recent applications of kinematic analysis leverage lidar or photogrammetry to extract bedrock discontinuity data and test kinematic failure criteria on complex slope geometries, like overhanging rock quarries (Fanos and Pradhan, 2018; Gigli et al., 2022). Increasingly, the acquisition of discontinuity data is accomplished using automated analysis of point cloud data acquired from terrestrial laser scanning (TLS) (Matasci et al., 2018) or lidar or photogrammetry acquired from uncrewed aerial systems (UAS) (Utlu et al., 2023). These approaches are powerful but can be challenging to implement across large areas characterized by steep, rocky forested slopes where the details of rock structure are often obscured by vegetation. As such, traditional, field-based means of bedrock structural characterization continue to be relevant.

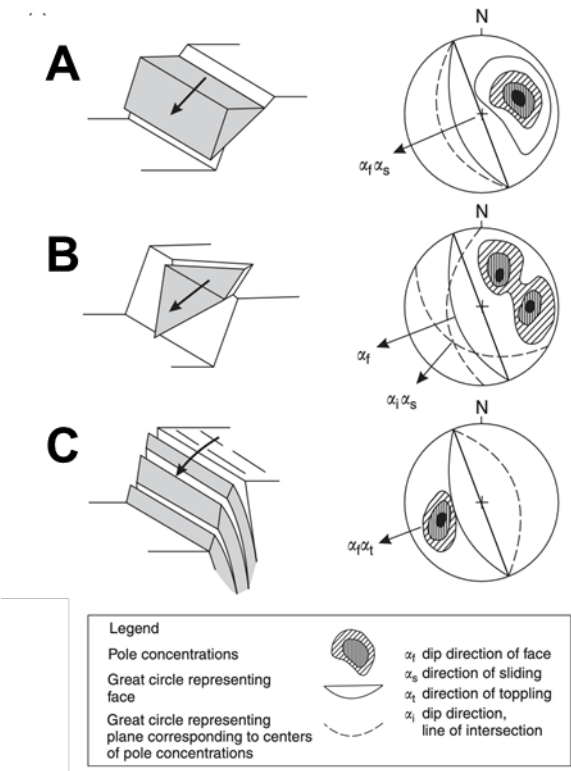

Figure 1. Schematic representation of common rock slope failure modes: (a) planar sliding, (b) wedge, and (c) toppling. On the right of each diagram are stereonet, where the rock slope face is represented by a solid black line, and poles to planar discontinuities that meet conditions for failure in shaded contours. Dashed lines represent planes of these discontinuities. Modified from Wyllie and Mah (2004).

Initially, rock fragments move via creep, sliding, toppling, or falling before traveling downslope by following ballistic paths and rolling across rocky or talus slopes until sufficient energy dissipation has occurred via impacts or friction (Caviezel et

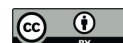

al., 2021). Computational rockfall runout models that account for the physics of these rockfall processes can estimate the trajectories and kinetic energy of falling rocks to determine potential downslope impacts (Leine et al., 2014). Many DEM-based tools exist with a range of parameterization options to perform physically-based rockfall simulations and predict the path of rocks over complex terrain and across variable land cover (Lu et al., 2021; Moos et al., 2021). These models have been successfully employed to mitigate rockfall hazard with diversion and attenuation structures, development setbacks, signage, or other means, in a variety of settings, including mines and national parks (e.g., Stock and Collins, 2014) such that rockfall risk can be reduced even though accurate prediction of triggering events remains elusive.

Although rockfall activity occurs in a wide range of geologic and climatic settings, it is particularly commonplace in post-glacial landscapes owing to glacial erosion that alters near-surface stresses, fracture density, topographic variations from glacial erosion, and changes in environmental conditions that occur in the wake of retreating glaciers (Ballantyne, 2002; Leith et al., 2014). In particular, the spatial pattern of glacial erosion can follow the fabric or trend of bedrock discontinuities and set up failure-prone conditions across extensive areas. As such, relatively small changes in the orientation and geometry of glacial valleys relative to the orientation of discontinuities can result in significant and systematic variations in rockfall susceptibility. Although it has been implied that the cumulative impact of small but frequent rockfalls in post-glacial settings can match that associated with large-scale but less frequent catastrophic or progressive rock slope failure, data are currently unavailable to rigorously test this notion (Barlow et al., 2012; Corominas et al., 2014; Hales and Roering, 2007; Hungr et al., 1999; Moore et al., 2009; Rosser and Massey, 2022).

Rockfall activity is common across much of Southeast Alaska but has been particularly acute in the Municipality of Skagway, which is situated in a narrow, glacially carved valley herein referred to as the ‘Skagway River valley, and hosts vigorous cruise ship tourism from late spring to early fall. Indigenous knowledge of avalanches in the area has been established (Thornton, 2010) and western documentation of rockfall activity in Skagway began in the late 1800s when gold prospecting fuelled the establishment of the town. Following decades of sporadic activity, several large rockfall events in summer 2022 impacted cruise docks along Skagway Harbor and generated renewed concern about the extent and scope of rockfall hazards in the area. In particular, the extent and timing of past rockfall activity is not well known and the susceptibility of rockfall initiation and runout in the area, and particularly along a ~5km long ridgeline that abuts the harbour, town centre, and railroad, has not been characterized. In this contribution, we summarize historic and geologic data that reflects the distribution and timing of past rockfall activity, document rock structure data from field observations, and synthesize new and existing lidar data from airborne and UAS platforms to inform a kinematic analysis susceptibility and dynamic runout model for Skagway and the surrounding area. Our findings establish the pervasive imprint of rockfall activity along slopes oriented to promote toppling failure. We highlight how the pattern of glacial erosion resulted in substantial rockfall erosion and cliff retreat along favourably oriented slopes while unfavourably oriented slopes experienced

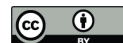

minimal modification since glacial retreat. Our coupled modeling reveals high variability in potential impacts which can inform mitigation efforts.

## 2 Study area: Skagway, SE Alaska

Near the northern extent of the Alaska panhandle, Skagway is situated in the Taiya Inlet atop deltaic and fluvial deposits near the outlet of a deep fjord (Fig. 2). The surrounding terrain is steep and rugged, composed of Tertiary granodiorite of the Coast Range Batholith, a belt of plutonic and metamorphic rocks that extends to northern Washington (Yehle and Lemke, 1972). Deformation in southeastern Alaska and southwest Yukon is governed by the subduction and translation of the Pacific-Yakutat plates relative to the North American plate in the St. Elias region (Biegel et al., 2024). The Eastern Denali Fault and the Chatham strait fault lineaments, both strike-slip fault systems, meet just south of Skagway (Choi et al., 2021). Deformation associated with these structures appears to impart a significant influence on the orientation of glacial valleys, as fjords in the area tend to be linear, striking north and northeasterly (Yehle and Lemke, 1972). A dam reconnaissance study focused on West Creek, a drainage just 9 km northwest of Skagway identified three joint sets in the granodiorite bedrock (Fig. 3c), two abundant sets with northeast-strike and vertical or steep dips to the south, and one less abundant set with northwest-strike and a consistent vertical dip (Callahan and Wayland, 1965). The authors also noted the coincident orientation of topographic lineations in the area and the strike of joints interpreted to be splays from the Chatham strait lineament, which is related to the nearly 3,000-km long Denali fault system. Spacing between the joints is variable, ranging from 1 to 4 meters, and the joints do not exhibit slickensides or cataclastic fabric (Fig. 3a,b). Sheeting joints in granodiorite observed near the tops of glaciated ridges are slightly curved or irregular, tend to parallel the ground surface, and spaced from 1 to 2 meters apart at the surface.

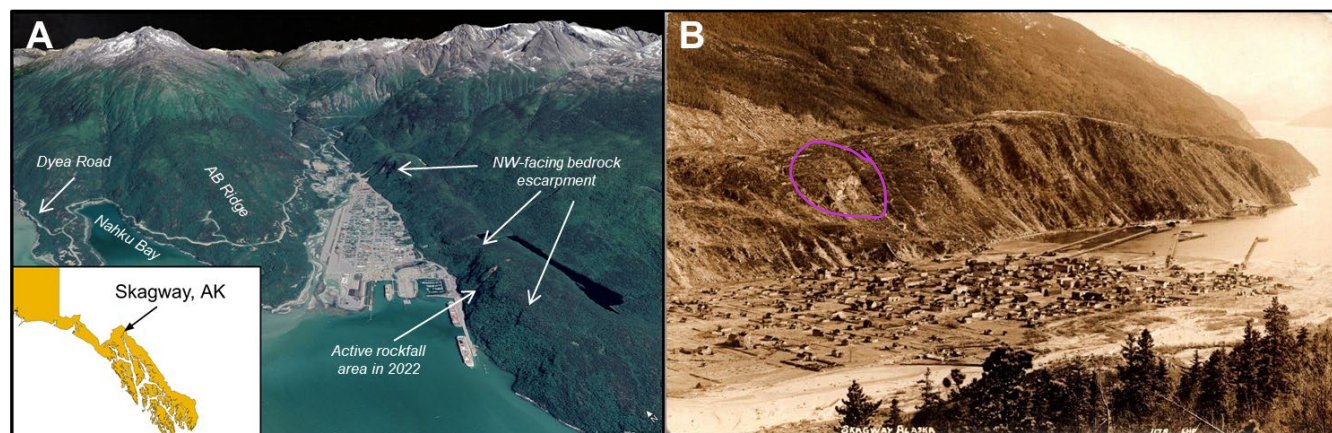



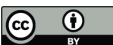

Figure 2. Study area. (a) Oblique view looking N-NE into Skagway River valley, Alaska. Note active rockfall along the NW-facing ridgeline and escarpment above the harbour and cruise ship docks. Use of Google Earth ©2025 permitted for non-commercial use. (b) Oblique view from AB Ridge looking SE across Skagway towards the NW-facing ridgeline and escarpment. This undated historic image (Wright et al., 2021) postdates the late 1890s construction of the current Skagway City Hall and Museum. Note the lack of vegetation and the sharp bedrock escarpment along the crest of the ridgeline and the abundance of active talus slopes that connect to the harbour.

Regional studies of glacial history imply that the most recent episode of major glacial retreat and valley exposure in Skagway occurred 10 to 12kya (Baichtal et al., 2021; Menounos et al., 2017) and icefields persist today in nearby inland valleys. The steep slopes around Skagway are generally devoid of glacial till owing to post-retreat erosion and deposition in valley floors in the form of alluvial fans and colluvial deposits.

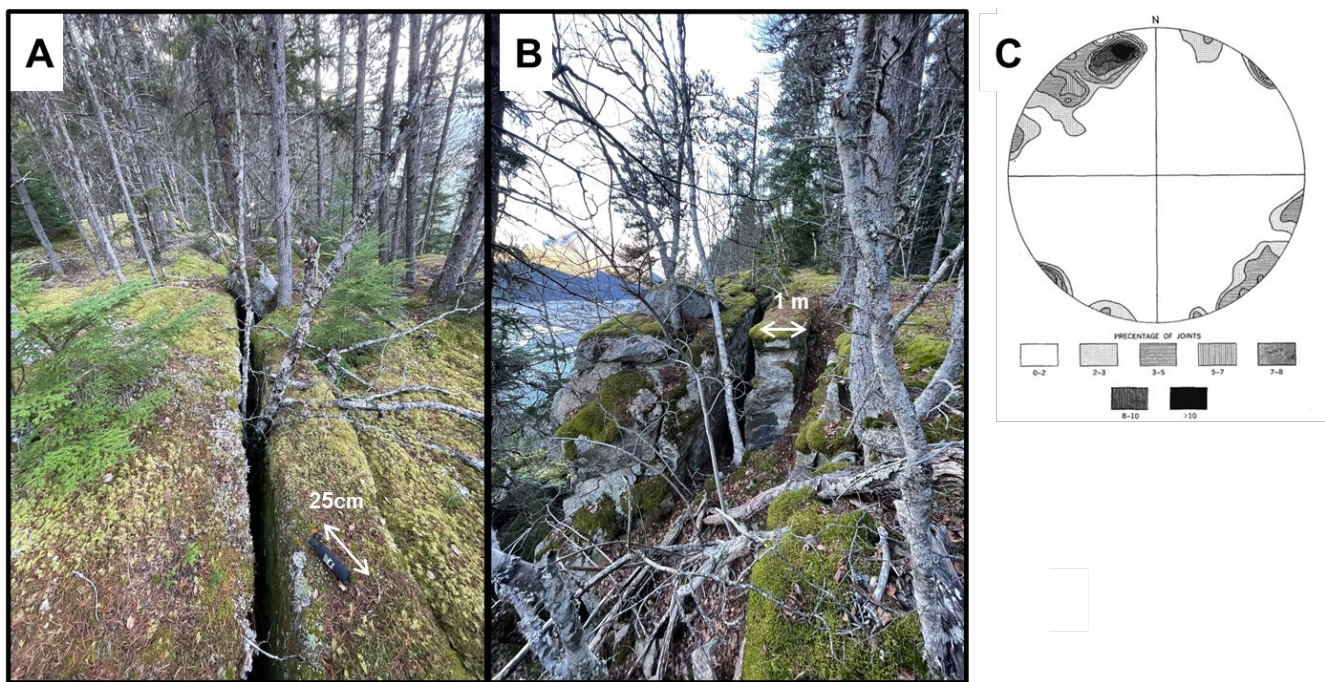

Figure 3. Images (a) and (b) of open joints and incipient toppling along the bedrock escarpment on the NW-facing ridgeline above Skagway Harbor. Equal-area, lower hemisphere stereonet with 1% area contours of 60 joints measured near Dyce, west of Skagway. Photos in (a) and (b) by Ian Madin and Josh Roering. Modified from Callahan and Wayland, 1965. See Fig. 4 for location.

Currently, Skagway experiences a subarctic maritime climate, characterized by cool summers and cold, snowy winters and current average summer temperatures range from 10 to 21°C, with occasional rainfall, and winter temperatures range from -



12 to -1°C, with heavy snowfall, and freezing conditions. High winds that funnel up the Taiya Inlet are common and for decades it was reported that Skagway's name originated from Tlingit words describing north winds (Thornton, 2010) although recent research concludes that the name derives from a contraction of 'Wushigagu Ye', which translates as "the Place with Solid Core Trees" (X. Twitchell, pers. comm, 2024). Compared to other areas in SE Alaska, Skagway receives low precipitation (mean annual precipitation is 1.1m) owing to the rain shadow imposed by the bounding coastal ranges to the south. Atmospheric rivers account for nearly 70% of annual rainfall in Skagway and intense precipitation associated with these phenomena occur with highest frequency and intensity from August to October (Nash et al., 2024). Skagway hosts a coastal rainforest of spruce, pine, and cedar trees with dense underbrush at low elevations (under 1,000m above sea level) and high-alpine tundra above tree line. Historical photographs and descriptions suggest that forests covering the slopes perched above Skagway Harbor and township were disturbed timber through harvest and burning in the early 1900s (Wright et al., 2021).

Early Western descriptions of rockfall activity in Skagway tend to focus on impacts to the harbour and railroad, including a series of events in 1901 that recorded burial of the tracks near the approach to the wharf (The Daily Alaskan, 1901). The location of this event coincides with the steep rocky slopes above Skagway Harbor, which have generated numerous rockfalls since that account (Fig. 2). A study of geologic hazards in Skagway noted the striking linearity of N- and NE-oriented fjords and valleys and identified abundant actively eroding bedrock escarpments on a NW-facing ridgeline that runs along the eastern margin of Skagway that coincides with a zone of historic rockfall activity (Yehle and Lemke, 1972). Downslope of these escarpments are colluvial deposits, consisting of landslide deposits, including talus from historic rockfall events. The abundance and extent of these deposits implies significant slope adjustment and retreat since glacial retreat and the relative activity of the deposits is based on the abundance or absence of vegetation cover. Across the valley on the western side of Skagway, these talus deposits are much less prevalent, and the Yehle and Lemke (1975) maps do not indicate the presence of erosional escarpments. On June 23, 2022, rocks detached from the eastern ridgeline and impacted the cruise ship dock where pedestrian traffic is frequent (Munson, 2022b). Two more rockfall events originating in the rocky slopes above the harbour followed in rapid succession on August 3 and 5, 2022 (Munson, 2022a).

Rockfall hazard mitigation in the area is currently focused on the active rockfall source areas above the cruise ship dock in Skagway Harbor. Engineering efforts have been completed, which include wrapping rock mesh covers over source areas, installing attenuator nets to block falling rocks, and scaling loose rocks (Brennan and Whistler, 2022). Instrumentation has been installed to monitor the source area, including extensometers installed at the top of the slope, which show that movement in the slide mass has increased from 4 cm per year to 6.5 cm per year as of 2022 (Brennan and Whistler, 2022). Notably, the small section of rocky slopes above Skagway's cruise ship dock, where the engineered mitigation and monitoring efforts are focused, is a small fraction of the roughly 5-km long stretch of ridgeline that borders the eastern margin of Skagway. Rocky escarpments and talus deposits have been noted along the entire ridge (Yehle and Lemke, 1972),

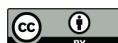

including the “Cemetery Slide”, a rockfall source area and runout zone stripped of vegetation by falling debris, which is similar to the active source areas above the cruise ship dock. Although these zones of localized activity are well known, the forest cover obscures the geologic and topographic signature of past rockfall activity along the remainder of the ridge such that the pattern of relative susceptibility and runout remains ambiguous.

## 3 Methods

### 3.1. Overview

Motivated by renewed rockfall activity, this study seeks to identify areas susceptible to rockfall initiation and runout within the steep, post-glacial valleys around Skagway. Our analysis extends to the west of Skagway along Dyca Road to the Tlingit settlement of Dyca and the Chilkoot Trailhead, which is a well-travelled corridor that also provides the opportunity to test our methodology across a wider range of topographic and structural configurations (Fig. 4). The components of our analysis include a historical rockfall inventory, synthesis of new and existing lidar data, geomorphic and structural mapping, kinematic analysis of rockfall susceptibility, and rockfall runout modelling.



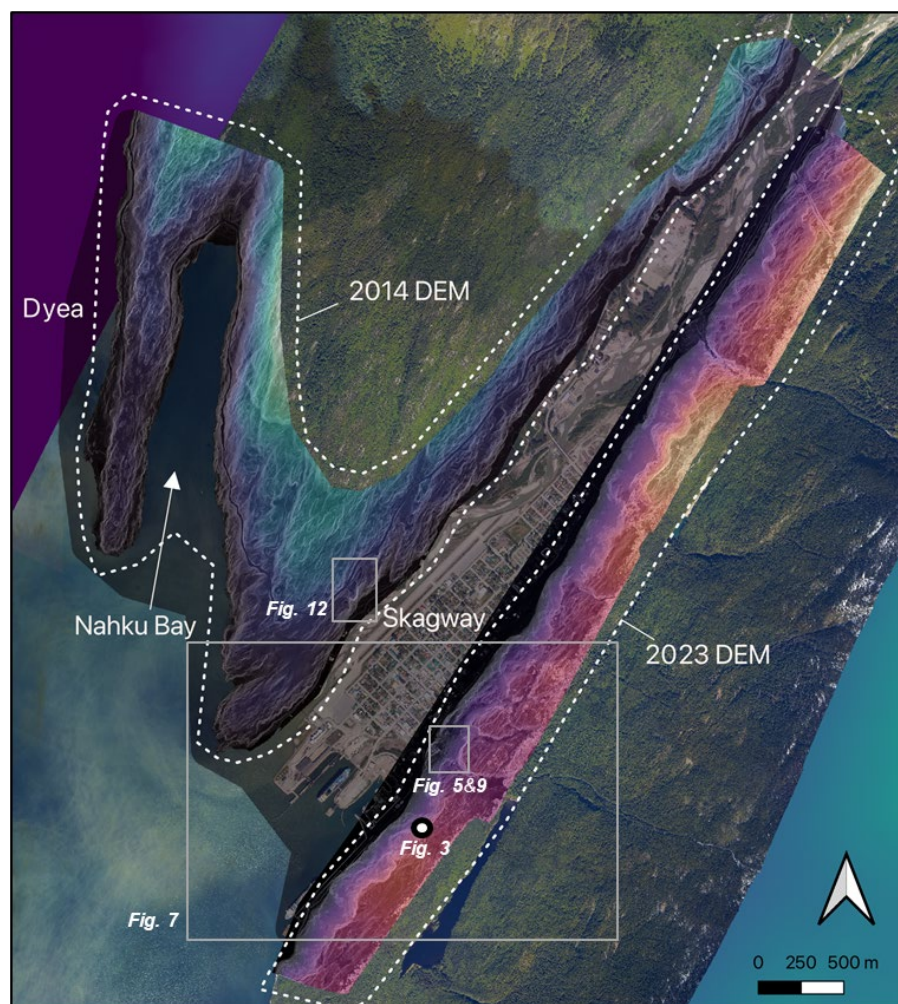

Figure 4: Location map of Skagway River valley, Nahku Bay, and Dyea showing 2014 airborne survey and 2023 UAS lidar DEM acquired for this study. The dashed lines demarcate the areas analyzed in this study. Gray boxes denote the extent of other figures. Background image from USGS NAIP (National Agriculture Imagery Program).

### 3.2 Rockfall inventory

We searched newspaper articles (primarily the Skagway News) and public announcements that describe the location and timing of rockfall events since August 26, 2017, which marks the beginning of rockfall mitigation efforts along the Skagway Harbor. In addition, we accessed data generated for rockfall events between 2005 and 2022 from the GeoEvent Slope Stability Database generated by the Alaska Department of Transportation & Public Facilities (AKDOT) Geotechnical Asset Management Program (Thompson, 2017). This database features details from AKDOT maintenance and operations reports,



including the location, date, event type (e.g., debris flows, rockfalls, landslides, snow avalanches, flooding), relative magnitude, and cost, of geologic events that impact the Alaska highway system.

### 3.3 High-resolution topography: Airborne and UAS lidar

Our analysis used two sources of lidar data to inform geomorphic and bedrock mapping, kinematic analysis, and runout modelling. One lidar DEM acquired in 2014 with an average ground classified point density of  $4.6 \text{ m}^{-2}$  is available from the Alaska Department of Geological and Geophysical Surveys (DGGs Staff, 2013) and includes low-elevation terrain in the Skagway River valley, Nahku Bay, and part of Dyea valley (Macpherson et al., 2014). Because this lidar acquisition does not span a significant portion of Skagway's rockfall-prone east ridge that abuts the township and harbour, we conducted a UAS lidar survey in 2023 (Fig. 4). We acquired lidar data across the  $2.3 \text{ km}^2$  area with peak elevations of 220 m near the cruise ship docks and 320 m near the northern extent of the ridgeline (Roering et al., 2025). For the acquisition, the NSF RAPID facility used a Trinity F90+ fixed wing drone with a Qube 240 lidar payload to fly  $\sim 120 \text{ m}$  above ground with 90% coverage overlap. The surveyed area was slightly abbreviated due to a patch of extremely steep terrain where the UAS could not be flown safely at distances sufficiently close to the ground surface to acquire data. The UAS survey produced a point cloud containing 650 million total points with 200 million ground classified points, giving an average ground point density of  $43 \text{ m}^{-2}$ . We used the ground points to create a 1 m DEM using CloudCompare (version 2.12.3) and combined it with the 2014 airborne lidar data to provide a seamless coverage for our analyses (Fig. 4).

### 3.4 Geomorphic mapping

We used field observations, historic photographs, and slope thresholds and surface texture from the combined lidar DEM to identify and map talus deposits that reflect the accumulation of rockfall deposits. These talus deposits include both forested and exposed occurrences. To define the characteristic slope angles associated with active talus slopes we measured slope angles from  $20^\circ$  to  $45^\circ$  that coincide with mapped talus deposits along the eastern ridge. Slopes steeper than  $45^\circ$  tend to correspond with bedrock cliffs and outcrops, whereas slopes gentler than  $20^\circ$  often reflect relatively uneroded bedrock surfaces or deposits from fluvial or mass wasting processes. The relatively smooth texture of accumulated rockfall deposits identified with hillshade and slopeshade layers (Burns and Madin, 2009) was also used to identify active talus slopes as well as bedrock cliffs or outcrops that constitute a rockfall source area. Talus deposits occur on a wide range of scales and for this analysis we focused on mapping patches of talus with area  $>100 \text{ m}^2$  to ensure accuracy and highlight zones of significant activity (Fig. 5).

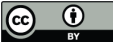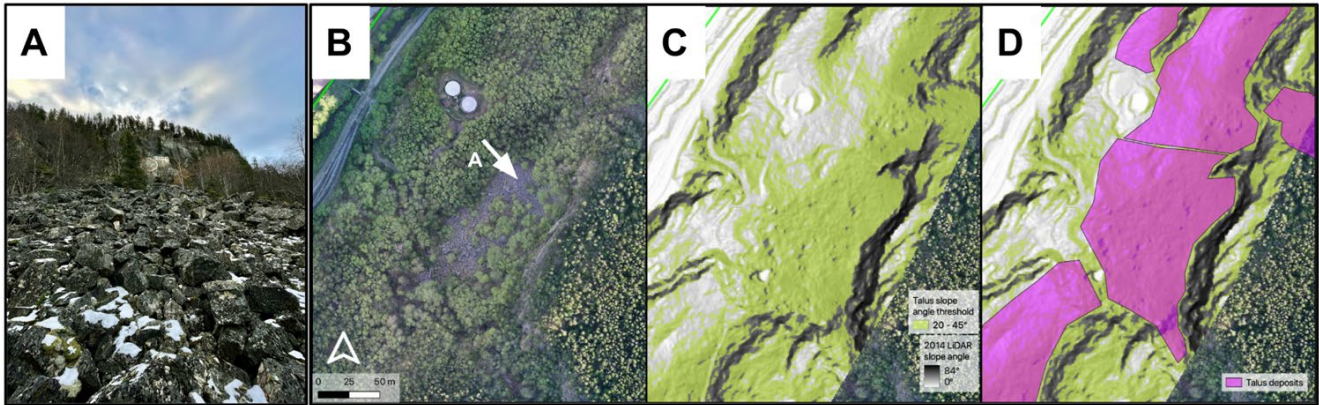

Figure 5: Field images and lidar mapping of talus mantled slopes. See Fig. 4 for location. (a) View looking SE along an exposed talus deposit with boulder sized clasts at the base of a 40 m cliff known as Kirmse’s Cliff on far left of image, (b) Aerial imagery from 2023 UAS survey showing the talus deposit and cliff (center left), white arrow represents photograph location and view direction, (c) Terrain within the slope angle range of 20°-45° colored in yellow, and (d) map of talus polygons generated from lidar slope shade and slope angle maps and orthoimagery. Hillshades in c and d derived from DGGS lidar data. Background image from USGS NAIP (National Agriculture Imagery Program).

### 3.5 Bedrock structure and discontinuities

To quantify the geometry of joints and discontinuities that contribute to rockfall initiation, we collected structural measurements at a range of distinct locations within the study area and combined them to generate a comprehensive discontinuity dataset (Kundu et al., 2023). The steep, forested, and uneven terrain surrounding Skagway limits access to outcrops and the traditional ‘scanline’ method (Priest and Hudson, 1981) was untenable. Furthermore, the significant forest cover and expansiveness of the study area precluded the use of ground-based laser or SfM (structure from motion) methods for acquiring structural information. Instead, we traversed the base of outcrops as an approximation of scanlines and measured the orientation of planar surfaces expressed in the outcrop with FieldMoveClino, a digital compass-clinometer smartphone app (Oliinyk et al., 2020), which enabled rapid and accurate data acquisition. Our measurements were acquired across a wide range of locations in the study area in order to characterize spatial variations in discontinuity orientations. In particular, we visited outcrops along the eastern and western sides of the Skagway River valley as well as outcrops in secondary valleys perpendicular to these ridgelines to ensure that the full range of relevant joint orientations were represented (Terzaghi, 1965).

### 3.6 Kinematic analysis of rockfall susceptibility

To assess the spatial pattern of rockfall susceptibility across the study area, we adopted a kinematic analysis approach and applied criteria for planar sliding and toppling failure within our combined lidar DEM. This approach foregoes the





mechanical complexity and extensive parameterization of more sophisticated analyses (e.g., Matasci et al., 2018) in order to generate results that span an extensive area. As described below, the remarkable consistency of discontinuity orientations across the study area inspired this approach and therefore we invoked the entire distribution of measured joint orientations at all locations to perform the kinematic analysis. Specifically, we applied the stability criteria for each failure mode at each pixel in the combined lidar DEM by estimating the fraction of the 337 joint orientations that are predicted to be unstable given the topographic aspect and slope angle of that pixel. The failure criteria for planar and toppling failure are defined following Wyllie & Mah (2004) and described below. Essentially, this approach is equivalent to locally performing a stereonet analysis of rock slope failure across our study area and aggregating the results to identify potential rockfall failure modes as well as areas of high relative susceptibility. For the analysis, we used a friction angle of  $40^\circ$ , consistent with measured values for jointed granodiorite similar to Skagway's lithology (Alejano et al., 2019). For validation of our modelled rockfall susceptibility maps, we compared our predictions to the location of recent rockfall events in Skagway, as well as mapped talus deposits which serve as a proxy for prior rockfall activity (Loye et al., 2009; Stock and Collins, 2014).

Planar slides occur when the inclination of a bedrock slab exceeds the friction angle and it slides along a planar discontinuity. Toppling failures occur when discontinuities steeply dipping into the rock slope face form slabs or columns of rock that rotate forward along a fixed base (Fig. 1). Two types of toppling failures can occur that are influenced by the strength of the rock mass and the geometry of discontinuities. Flexural toppling, where slabs of rock bend forward until they break in flexure, is typical in shale and slate where orthogonal jointing is not well developed. Block toppling is common in bedrock with orthogonal joint sets, where two steeply dipping joint sets form the sides of blocks, and a third set of low angle, widely spaced joints form a basal failure plane. The active rockfall source area situated above Skagway's cruise ship dock has been described as a progressive toppling failure with a stair-stepped basal feature (Brennan and Whistler, 2022). Topple failures observed in the field are consistent with this description, which is described by the block toppling failure mechanism. As a result, our analysis focuses on block toppling although we also account for planar sliding given that sporadic sliding was observed in the field. Field observations and geotechnical reports do not identify wedge failure as a potential mechanism and we opted not to include it in our analyses.

The criteria for planar, wedge, or toppling failure is based on the orientation of discontinuities and their orientation relative to the rock slope face (Wyllie and Mah, 2004). The dip direction of the discontinuity and rock slope is given by  $\alpha_A$  and  $\alpha_f$ , respectively, and the dip angle of the discontinuity and rock slope, both relative to horizontal, is given by  $\psi_A$  and  $\psi_f$ , respectively. The friction angle of the joint interfaces is given by  $\phi$ .

Accordingly, a rock slope is susceptible to planar sliding failure along a discontinuity if the following three conditions are simultaneously met:



$$|\alpha_A - \alpha_f| < 20^\circ; \psi_A < \psi_f; \psi_A > \phi \quad (1)$$

The first condition requires that the interfaces are aligned in a sufficiently similar orientation (in this case within  $20^\circ$ ) while the second ensures that the discontinuity dip is shallower than the angle of the bedrock slope such that the discontinuity intersects or ‘daylights’. The third and final condition demands that the interface slope angle exceeds the angle of friction. All three conditions must be met at a given location for planar sliding to be deemed likely.

For block toppling failure, the following two conditions must be met simultaneously:

$$\alpha_f - 20^\circ < (\alpha_A \pm 180^\circ) < \alpha_f + 20^\circ; (90^\circ - \psi_f) + \phi < \psi_A \quad (2)$$

The first condition asserts that the discontinuity must dip into the rock slope face and be parallel, or nearly parallel (e.g., within  $20^\circ$ ), to the dip direction of the slope face. The second condition indicates that the discontinuity dip must exceed the friction angle allowing for interlayer slip between the blocks. In our model, the maximum allowable dip direction deviation is  $\pm 20^\circ$  for both planar slide and block toppling failure. Although this value was often chosen to be  $\pm 10^\circ$  for block toppling we expanded the constraint to  $\pm 20^\circ$ , consistent with recent contributions (Cruden, 1989; Gigli et al., 2022).

Kinematic analysis requires discontinuity data that is locally representative. Traditionally, discontinuity measurements are taken in the field, whereas many modern applications extract discontinuity orientations from high-resolution point clouds of the rock slope face (Utlu et al., 2023). Field measurements remain a reliable and relevant means to capture joint orientations (Kundu et al., 2023), especially in locales where terrestrial laser scans are not feasible due to hazardous terrain or where slope faces are obscured by vegetation.

Using equations 1 and 2, we estimated the number of joints in our field-derived dataset ( $n=337$ ) that are predicted to exhibit planar and toppling failure, respectively, for each pixel in our combined lidar DEM. Our maps of planar and toppling failure are then calculated as the percentage of joints that meet the conditions required for failure conditions. For example, a toppling failure index value of 0.31 for a given pixel in our DEM indicates that 31% of the joints in our joint dataset satisfy the two conditions in equation 2. This approach provides a description of relative rockfall initiation susceptibility across our study area.

### 3.7 Rockfall runout modelling with RAMMS

To model potential runout paths associated with rock slopes that have high rockfall susceptibility, as determined by our kinematic analyses, we used the 3D rockfall simulation software RAMMS:Rockfall (<https://ramms.ch/ramms-rockfall/>) to represent the sliding, bouncing, and rolling motion of rock clasts. This model accounts for the energy balance of falling rocks



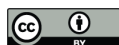

and has been used extensively at a range of scales for both applied and fundamental research studies (Leine et al., 2014; Lu et al., 2019). The primary inputs required for the RAMMS model include digital elevation data (i.e., DEM), the location of rockfall source areas, specification of ground cover, and the shape and size of the falling blocks.

We used our combined lidar DEM, which has a 1x1 m pixels and spans the area shown in Fig. 4. To identify potential source areas, we identified pixels in our maps of toppling susceptibility with values greater than 5%. Pixels with >5% toppling susceptibility demarcate rocky cliffs situated above our mapped talus deposits as well as areas of recent rockfall activity in the Skagway Harbor (Fig. 5). The pixels with a >5% high toppling susceptibility were converted to polygons and only polygons with area greater than 25 m<sup>2</sup> were retained in order to eliminate local high-relief features like boulders and trees that can perpetrate the signature of rockfall source zones. Rockfall source points for RAMMS modelling were randomly distributed across the polygons with a density of 0.02 m<sup>-2</sup> and a minimum point spacing of 5 m. This methodology follows convention used in other studies (Lu et al., 2021) and yielded nearly 5,000 rockfall initiation points for our RAMMS simulations.

The slopes east of Skagway are heavily forested, except in locations where falling debris has stripped vegetation, such as the cruise ship dock and at the northern extent of the eastern ridge bordering Skagway. In RAMMS, we represented forested areas as spruce alpine forests and trees were simulated in these areas using the ‘dense forest’ category in RAMMS, which is defined by a stem density of 600 trees per hectare with a mean diameter of 30 cm. These parameters were chosen based on our field observations and the typical density of mixed red alder coniferous stands in Southeast Alaska (Poage et al., 2007). The effect of trees in the RAMMS rockfall runout module is to attenuate energy and reduce velocity, thus constituting a significant impact on hazard potential. The very small amount of terrain (less than 5% of the study area) that exists outside these forested areas was set to the fine talus category in RAMMS, which reflects negligible ground cover atop relatively fine-grained talus deposits. We performed simulations with and without forest cover in order to assess the potential role of timber harvest and fire on rockfall runout and provide a conservative assessment of the hazard extent.

We estimated representative block size and shape by measuring blocks in exposed talus piles. To estimate block size, the intermediate axis of 74 blocks was measured from high-resolution point clouds combined with orthoimagery. We determined the mean intermediate axis size to be 1.08 m while the 50<sup>th</sup> percentile was 0.66 m and the 95<sup>th</sup> percentile was 3.56 m. Blocks observed in the field are typically tabular and the shape of blocks was estimated by measuring the long, intermediate, and short axes of 10 blocks with sufficient exposure to allow measurement using our UAS-derived point clouds. The block dimensions were measured and we applied the resulting aspect ratio to the 50<sup>th</sup> percentile and 95<sup>th</sup> percentile intermediate axis values from our block size measurements. The dimensions of the resulting rocks used in the simulation were 0.94 m x 0.66 m x 0.37 m (medium, 50<sup>th</sup> percentile), and 5.10 m x 3.56 m x 1.99 m (large, 95<sup>th</sup> percentile), which represent moderate



and large clast sizes, respectively. Given the tendency for large clasts to travel longer distances, our 95<sup>th</sup> percentile blocks are intended to reflect the conservative (or long runout) scenario.

To simulate the range of potential rockfall impacts, we focused on four scenarios for RAMMS simulation with the following parameterizations: 1) 50<sup>th</sup> percentile clasts with no forest cover, 2) 50<sup>th</sup> percentile clasts with dense forest, 3) 95<sup>th</sup> percentile clasts with no forest over, and 4) 50<sup>th</sup> percentile clasts with dense forest. To account for the stochastic nature of rockfall release, we used RAMMS to select 1 of 10 randomly chosen rock clast orientations to be released at each source point, yielding nearly 50,000 individual rockfall runout paths in each of the four simulations.

For our runout analysis, we focused on the eastern NW-facing ridgeline of the Skagway River valley given the need to assess impacts to the harbour and township. Because each simulated runout event results in an individual rockfall path, it can be difficult to effectively visualize the cumulative pattern of predicted runout. To identify terrain with high likelihood of rockfall runout we used RAMMS to count the number of rockfall events that traversed each pixel in our domain for each of the four scenarios. As such, the cumulative number of rockfall passages at each pixel accounts for both the abundance of upslope source areas as well as the tendency for topography to steer or direct rockfall into particular pathways. In addition, we used RAMMS to create a “digital” boundary (or barrier) coincident with the railroad tracks along the base of the ridgeline to record the number and kinetic energy of modelled rockfalls that bypass the boundary and impact the harbour and township.

## 4 Results

### 4.1 Rockfall inventory

Descriptions of rockfall events before 2005 can be found in newspaper articles dating back over a century, although we focus on recent events in this contribution. We identified 11 reported rockfall events reported in the Skagway News since 2017 (Table 1). These reports tended to reflect sporadic rockfalls along Dyea Road as well as activity in 2022 abutting Skagway Harbor on the eastern ridgeline. Many reports are recorded in the police blotter section of the Skagway News, but the timing and location of these events is sometimes unclear and those cases were not included in our rockfall inventory. The AKDOT GeoEvent database includes 536 reports of rockfall-related maintenance and operation activities in our study area between 2005 and 2022. Notably, this database does not include events along the eastern ridgeline in Skagway because those events do not impact the state highway system. Rather, the vast majority (>415) of the AKDOT reports originate from the NW-facing sections of Dyea Road west of Skagway. Among those events, 7 resulted in road closures that lasted 3 days or longer in March 2012, October 2012, January 2014, March 2015, February 2016, September 2016, and December 2020.

Table 1: Rockfall events reported in the Skagway News since 2017

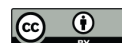

| Event date   | Event time (local) | Pre-event 24-hr rainfall total (inches) | Location         |
|--------------|--------------------|-----------------------------------------|------------------|
| 9-Oct-2023   | n/a                | 0.63                                    | East Dyea Valley |
| 7-Oct-2023   | n/a                | 1.46                                    | Eas Nahku Bay    |
| 18-May-2023  | 6:17pm             | 0                                       | North Slide      |
| 29-Sept-2022 | 3:57pm             | 0.50                                    | East Nahku Bay   |
| 5-Aug-2022   | n/a                | 0.04                                    | North Slide      |
| 3-Aug-2022   | 5:00pm             | 0.02                                    | North Slide      |
| 23-Jun-2022  | 7:30am             | Trace                                   | South Slide      |
| 2-Dec-2020   | 12:23pm            | 3.24                                    | East Nahku Bay   |
| 5-Sept-2017  | 5:30am             | 0.76                                    | North Slide      |
| 5-Sept-2017  | 3:00am             | 1.05                                    | North Slide      |
| 26-Aug-2017  | 6:30am             | 0.55                                    | North Slide      |

Rockfall events reported in the newspaper and AKDOT database occur sporadically throughout the year with most activity in the summer and fall months. Some high impact events correspond with intense rainfall events although most events do not coincide with an obvious climatic trigger. Rockfall activity on December 2, 2020, was preceded by over 3 inches of rainfall in the previous 24 hours. By contrast, a May 2023 event, which we observed in the field, initiated on a clear, sunny day with no precipitation in the 24 hours leading up to the event. In addition, the August 2022 events that impacted Skagway Harbor were not preceded by notable rainfall. Thus, while precipitation plays a role in initiating some rockfall events in Skagway other triggers maybe relevant making prediction difficult.

## 4.2 Geomorphic mapping

The morphology of glaciated valleys around Skagway is variable owing to bedrock structure, differential glacial erosion, and post-glacial landscape evolution. These factors generate systematic variations in the abundance of bedrock cliffs that serve as rockfall source areas as well as long, steep slopes that facilitate long rockfall runout. On the east side of the lower Skagway River valley, our lidar DEM and field observations reveal a distinct northwest-facing bedrock escarpment that runs parallel just below the crest of the ridgeline (Fig. 1, 6). This feature is particularly distinct above the cruise ship dock, where the ridgeline has high relief compared with sections to the north that abut the township. A similar high-relief escarpment also emerges on the same ridgeline near the northern extent of the township. Below these bedrock escarpments, we observe abundant talus deposits that extend continuously downslope to the base of the ridgeline and the valley floor (Fig. 6). An undated historic photograph which postdates the 1899 construction of the current Museum and City Hall depicts the eastern ridgeline in a state of minimal forest cover such that the escarpment and talus slopes above the harbour are clearly visible (Fig. 2b). These observations imply substantial post-glacial erosion through lateral (southeastward) retreat of the ridgeline as talus slopes convey bedrock downslope creating long and relatively smooth pathways for rockfall runout. On that image, the ridgeline slopes just north (on the left side of the image) exhibit gentler slope angles and a benchy morphology which implies less extensive post-glacial erosion and slope modification via rockfalls (Fig. 2b). Atop the ridgeline and east of the escarpment, the ridgeline contains abundant evidence of unmodified glacial erosion features. The west side of the lower



Skagway River valley has a very different morphology, in that it lacks a distinct escarpment and instead exhibits consistent and gradual slopes that imply minimal post-glacial modification. Locally, we observe vertical cliffs along the Skagway River. Otherwise, the topography on the west side of the lower Skagway River valley primarily consists of rock slopes that form prominent ridges that parallel the strike of the valley. We observe a similar pattern of bedrock escarpments and talus deposits along northwest-facing slopes of two parallel **ridgelines** between Skagway and Dyea (Fig. 6).

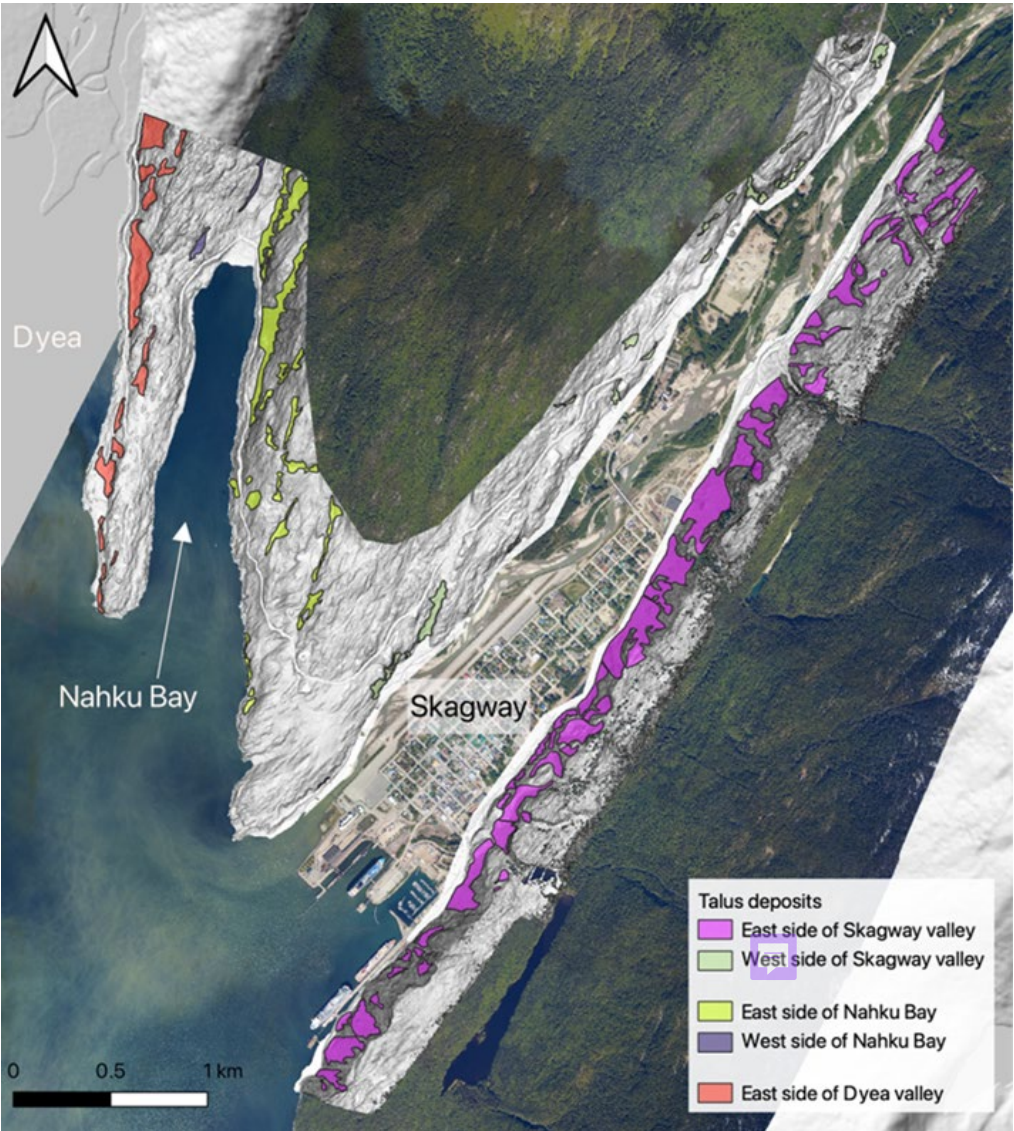

Figure 6: Distribution of talus deposits in study area. Polygons identified by their location: Skagway River valley, Nahku Bay, and Dyea valley. Note the abundance of talus deposits on the NW-facing ridgeline in Skagway and on NW-facing slopes in



425 Nahku Bay and near Dyea. Hillshade derived from DGGS lidar data. Background image from USGS NAIP (National  
426 Agriculture Imagery Program).

427

428 Our lidar- and field-derived mapping revealed abundant talus slopes on northwest-facing ridgelines across our study area.  
429 More generally, talus deposits compose 12% of the 7.2 km<sup>2</sup> total mapped area. Along the eastern ridgeline, we identified 56  
430 talus slopes with an average area of 9,290 m<sup>2</sup>, which collectively make up 20% of that ridgeline area. On the west side of the  
431 lower Skagway River valley, the southeast-facing ridgeline hosts 20 talus deposits, and these talus slopes constitute only 3%  
432 of the 1.67 km<sup>2</sup> mapped area on that side of the valley. Similarly, talus deposits on the southeast-facing ridgelines bordering  
433 Nahku Bay are much less abundant (1%) and smaller in area than on the northwest-facing ridgeline that abuts the bay (11%).

### 434 **4.3 Bedrock structure and discontinuities**

435 To characterize the geometry of discontinuities with the potential to generate rockfalls, we collected 337 joint orientations  
436 from 36 granodiorite outcrops across the study area (Supplemental material) and plotted the data as poles to planes on an  
437 equal area stereonet to identify dense clusters of poles which were then grouped into joint sets (Fig. 7). Three joint sets were  
438 identified in this survey, two steeply dipping orthogonal sets (*J1* & *J2*), and one set that dips gently to the west (*J3*). The  
439 steeply dipping joints are of relevance, as they tend to be conducive to toppling, which is the most observed failure mode in  
440 Skagway. The most densely defined joint set is *J1*, which parallels the strike of the lower Skagway River valley and the  
441 eastern ridgeline and predominantly dips to the southeast. The less densely defined joint set (*J2*), is approximately  
442 orthogonal to *J1*, has near vertical dips, and strikes northwest. The third, gently dipping joint set (*J3*), are interpreted as  
443 sheeting joints, typical in plutonic rocks, which have significantly higher curvature at the outcrop scale than the steeply  
444 dipping orthogonal joints resulting in an elongate field of poles on the stereonet.

445



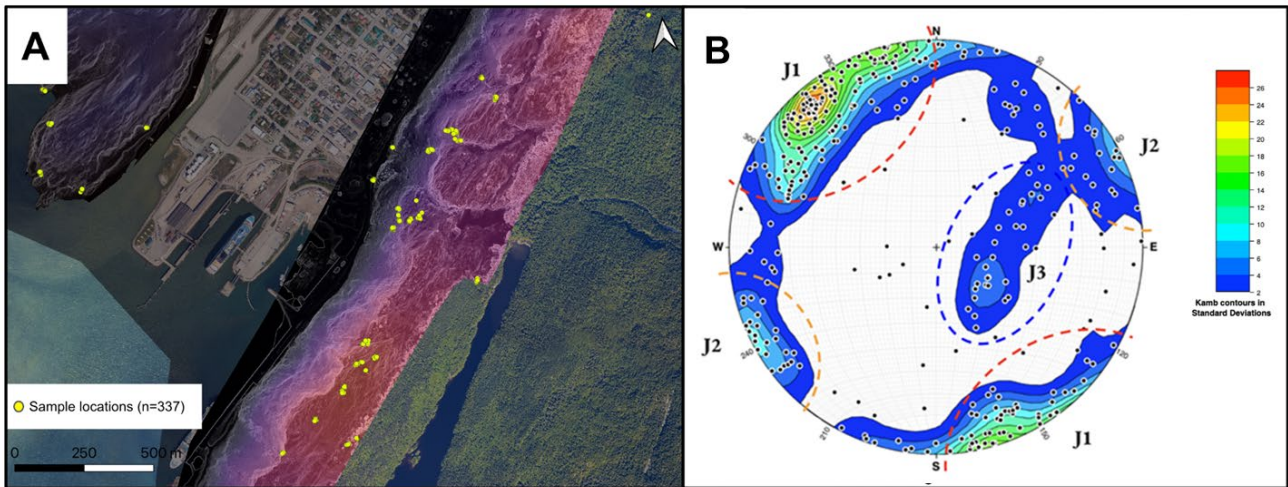

Figure 7: Structural data (a) Location of 337 structural measurements from 36 outcrop locations distributed across Skagway Valley and the AB ridgeline separating Skagway from Nahku Bay. See Fig. 4 for location. (b) Lower hemisphere equal area stereonet of joint measurements visualized as poles to planes (n=337) with Kamb contours to highlight dense clusters of poles, which were grouped into three joint sets (J1, J2, and J3). Background image in (a) from USGS NAIP (National Agriculture Imagery Program).

#### 4.4 Kinematic analysis of rockfall susceptibility

The abundance of consistently oriented joints with vertical or sub-vertical dips suggests that rock toppling is the dominant rockfall mechanism in Skagway, which is supported by field observations. Furthermore, given the consistent orientation of sub-vertical joints, the primary control on susceptibility to toppling is the orientation and inclination of rock faces (equation 2). On the crest of the eastern ridgeline in the lower Skagway River valley, for example, the glacially flattened bench at the top of the slope is not steep enough to meet topographic conditions for either failure mode (Fig. 5). As one moves to the west side of the crest, however, the gentle ridgetop abruptly transitions to the steep escarpment where overhanging, cliffy bedrock slopes are observed. At this position on the ridgeline, our analyses show that large patches of terrain have a substantial portion (> 25%) of discontinuities that promote toppling failure according to equation 2 (Fig. 8). At downslope locations (i.e., between the ridgeline and valley floor), rock slopes continue to exhibit patchy zones of toppling susceptibility, many of which are in close proximity to Skagway township and harbour. Along the rock slopes on the west side of Skagway, our analyses reveal fewer and smaller patches of terrain susceptible to toppling with less than 10% of the discontinuities predicted to be unstable. We observe a similar pattern along the sub-parallel ridges west of Skagway along Dyea Road with northwest-facing ridgelines exhibiting abundant patches of terrain with high propensity for toppling failure (Fig. 8). Finally, we observe small areas of terrain with planar failure susceptibility according to equation 1 and in these patches, less than 5%



of the joints are predicted to promote planar sliding. More generally, by combining our talus slope maps with toppling failure susceptible zones, we note a strong correspondence such that zones with >5% toppling failure commonly occur just upslope of talus-mantled slopes (Fig. 9).

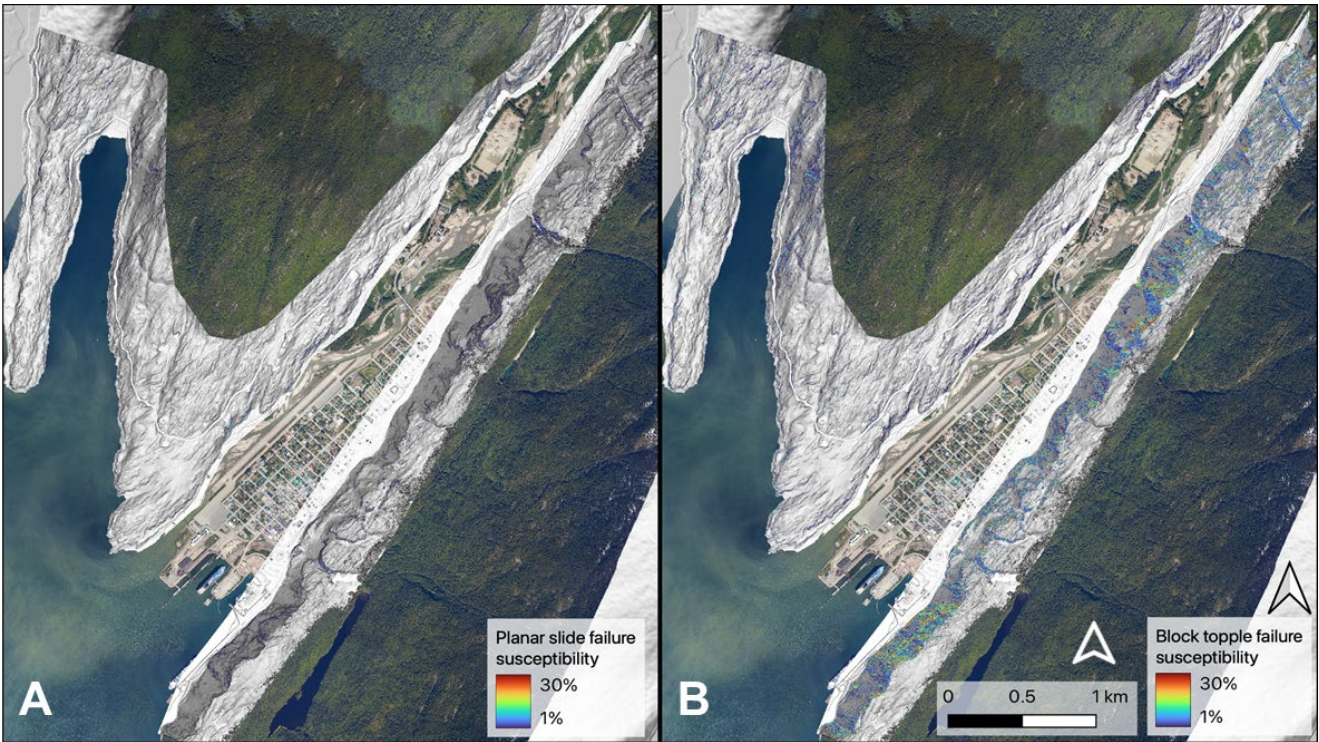

Figure 8: Maps of rockfall susceptibility indices using combined 2014 airborne and 2023 UAS lidar datasets. (a) Susceptibility to planar slide failure according to equation 1, and (b) susceptibility to block toppling according to equation 2. Both indices are estimated as the percentage of joints deemed unstable at each pixel. Note the abundance of toppling failure zones on NW-facing rock slopes that border Skagway and Nahku Bay. Hillshades in a and b derived from DGGs lidar data. Background image from USGS NAIP (National Agriculture Imagery Program).



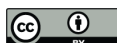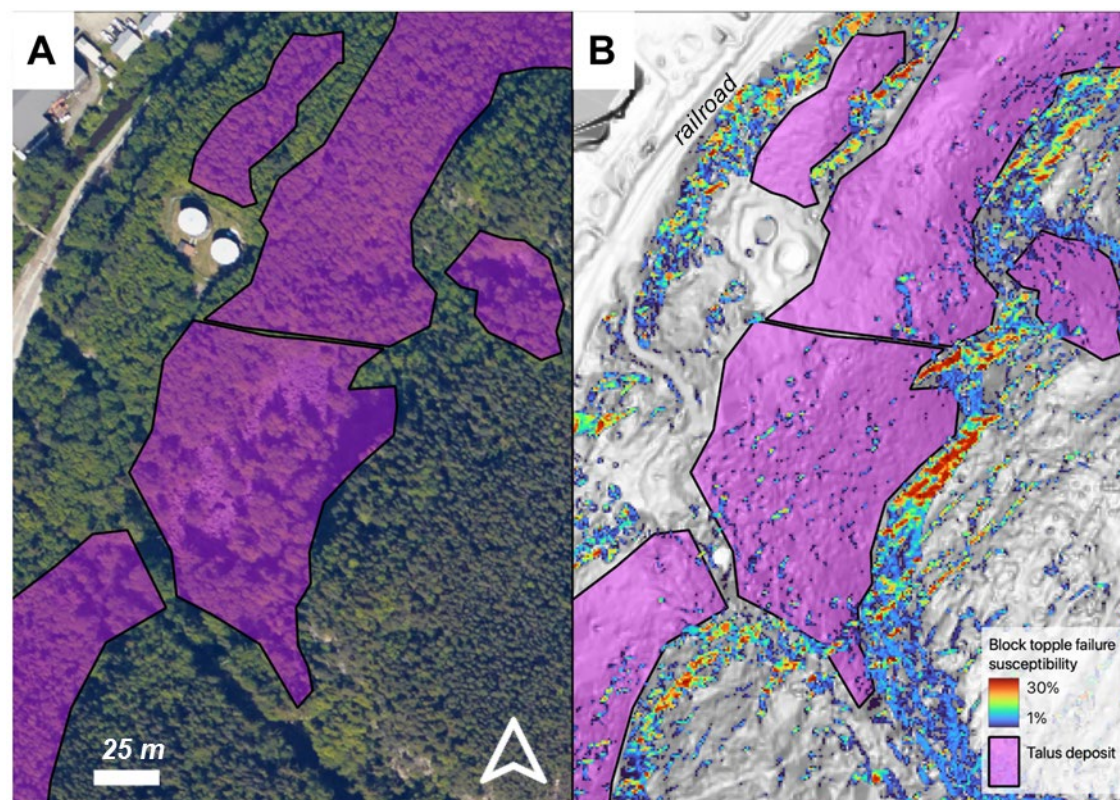

Figure 9: Map of talus deposits and block toppling susceptibility index (percentage of joints deemed unstable in each pixel according to equation 2). See Fig. 4 for location. (a) Orthoimage of Kirmse's cliff and the partially forested talus deposit at the base of the slope, (b) Block toppling susceptibility index. Note the abundance of susceptible toppling areas perched above the talus deposits. Background image in (a) from USGS NAIP (National Agriculture Imagery Program). Hillshade in (b) derived from DGGS lidar data.

#### 4.5 Rockfall runout modelling using RAMMS

By using zones of high toppling susceptibility ( $>5\%$ ) as source areas for rockfall initiation we used RAMMS to model the runout of nearly 50,000 rockfall events for each of the four scenarios that account for differences in clast size and ground cover. Our simulations showing the total number of rockfall events traversing each pixel reveal distinct zones subject to high rockfall susceptibility as well as extensive downslope transport (Fig. 10). In each of the four scenarios, the southern end of the ridgeline above the harbour (between 4 and 5km on our railroad-based transect) exhibits  $\sim 10$  specific chutes or paths of likely rockfall runout whereby initiation near the escarpment results in the concentration of rockfall runout along these paths and conveyance to the cruise ship docks and/or harbour (Fig. 10). This zone coincides with the area of high-relief terrain and extensive escarpment development. In contrast, the central portion of the ridgeline (between 2.8 and 4km) immediately



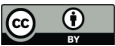

adjacent to much of the township exhibits patchy and less frequent rockfall activity along gentle and irregularly oriented bedrock steps and benches. Further north, our simulations again reveal abundant long rockfall runout paths at the northern extent of the township with a concentration near the Cemetery Slide area (between 1 and 2km). Finally, at the northernmost extent of our simulation domain (near 1km), the results show patchy and short rockfall transport paths coincident with gentle, benchy topography. Although the relative pattern of predicted runout described here is consistent across the four scenarios, our simulations of 95<sup>th</sup> percentile size clasts and no forest cover result in the most abundant passage of rockfall events to the valley floor with high potential for impacting infrastructure and imperilling public safety (Fig. 10d).

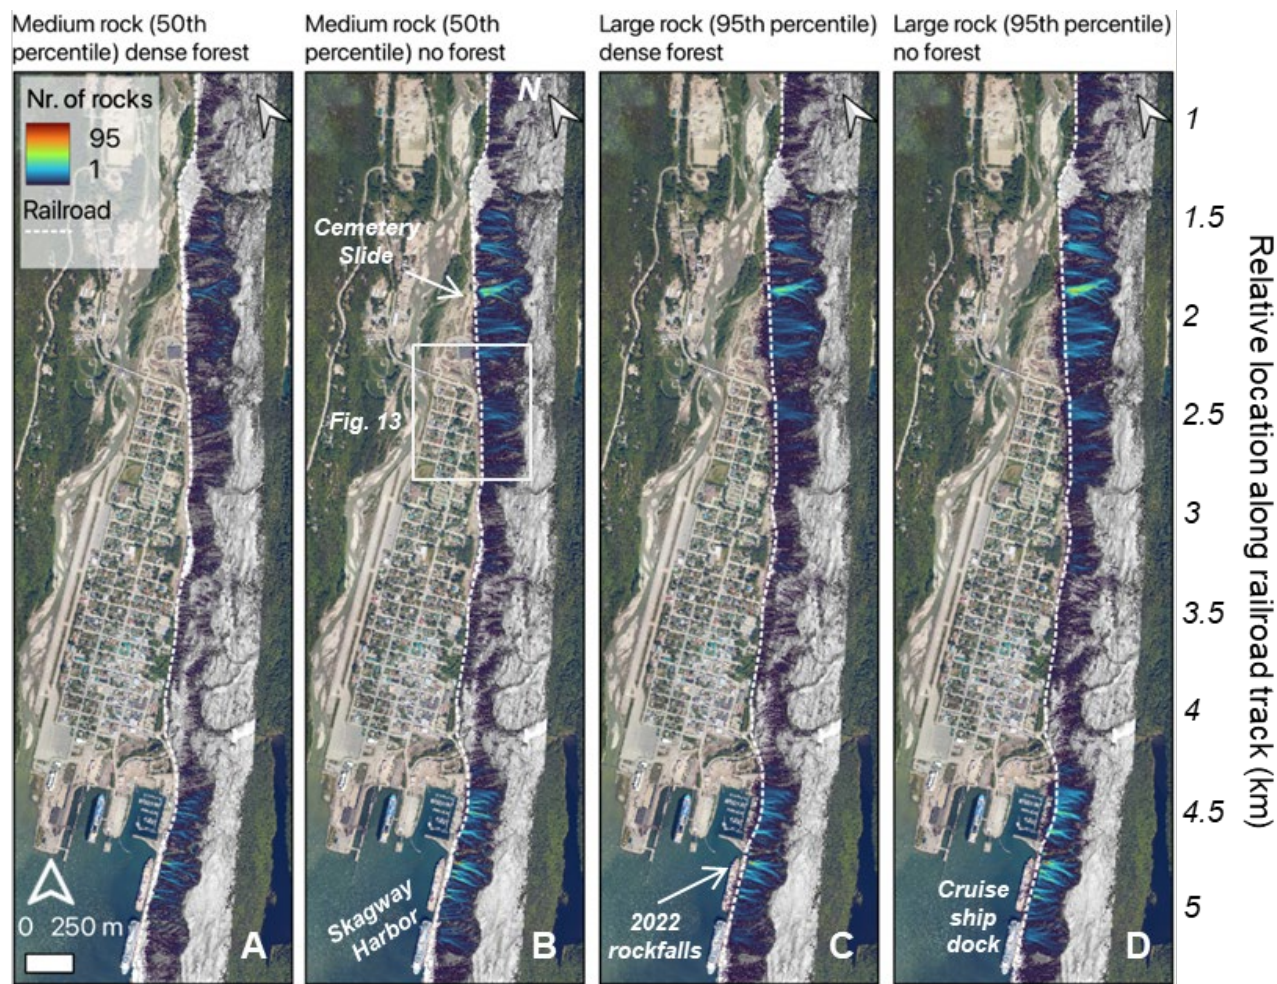

Figure 10: Map of modeled rockfall runout along eastern ridgeline in Skagway Valley conducted for 4 scenarios with variable clast size and land cover (panels a-d). The number of rockfall events that traverse each cell is indicated by the color ramp with warm colors reflecting frequent rockfall passage. Note the abundance of long runout events in the SW section bordering the harbour and near the northern extent of the township. The dashed white line denotes the railroad track used to document rockfall runout and kinetic energy in Fig. 11 for relative position along the tracks. The white box in (c) denotes the area shown



in Fig. 13, site of an historic rockfall event that impacted the township. Hillshade derived from DGGs lidar data. Background image from USGS NAIP (National Agriculture Imagery Program).

512

To characterize the location and potential impact of simulated rockfall events that reach the valley floor, we tallied the number and kinetic energy of simulated rockfall events that traverse the railroad track (Fig. 11). In each of these scenarios, the north-to-south alternating pattern of high-low rockfall runout hazard is reflected in the number and kinetic energy of clasts that travel to the base of the ridgeline. Given the 49,450 simulated rockfall events in each of the four scenarios, <2% and 12% rocks crossed the railroad for the dense forest and no forest scenarios with the 50<sup>th</sup> percentile clast size, respectively. By contrast, using the 95<sup>th</sup> percentile clast size resulted in nearly 20% and 28% rockfall passage of the railroad in the dense forest and no forest scenarios, respectively. These results highlight the importance of dense forest and clast size in determining risk of rockfall runout.

521

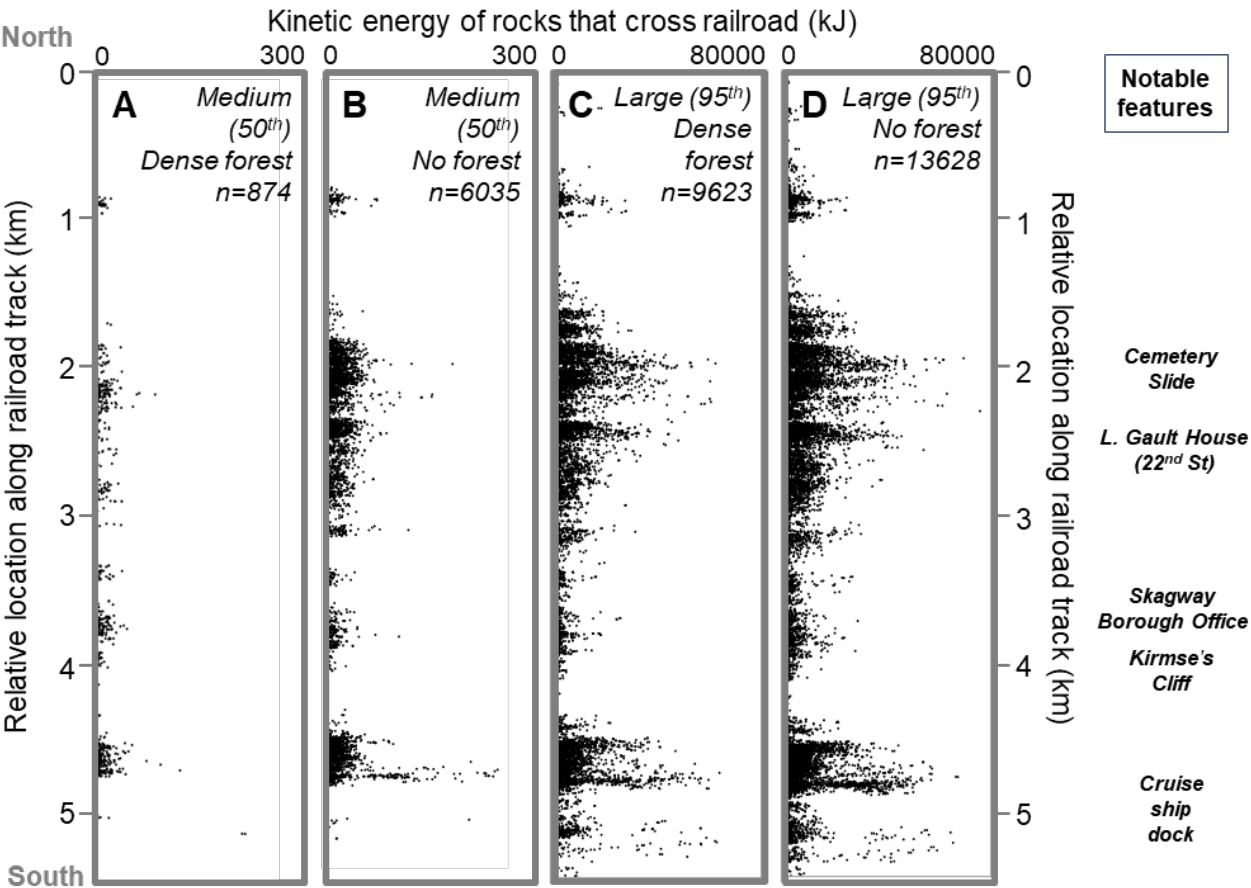

522





Figure 11: Kinetic energy of simulated rocks that pass the railroad tracks (see Fig. 10 for location) for 4 scenarios with variable clast size and land cover (panels a-d). Note the difference in scale of kinetic energy between panels (a,b) and (c,d). The number of rocks that pass across the track is highest for the scenario with the largest clast size and no forest cover. Notable locations are annotated along the right margin of the plots.

## 5 Discussion

Rainfall appears to be responsible for triggering some rockfall events in Skagway, but the majority of rockfall events are not preceded by heavy precipitation. Therefore, accurately predicting the timing of rockfall events based on precipitation metrics, like rainfall initiation thresholds used to estimate the likelihood of landslide initiation in Sitka, AK (Patton et al., 2023), is not likely to be successful. Instead, estimating the spatial pattern of rockfall susceptibility is a useful approach to mitigating rockfall hazard. Taken together, our analyses of rockfall susceptibility and talus deposition maps demonstrate that rockfall source areas and runout paths tend to be located on northwest-facing rock slopes in the lower Skagway River valley, Nahku Bay, and the lower Taiya River valley, indicating a strong topographic control on rockfall activity owing to the regularity of glacial valleys and joint orientations in the area.

The joints measured in this study are consistent with the steeply dipping, orthogonal joint sets measured in a nearby structural survey in **West Creek** (Callahan and Wayland, 1965) and described in a geotechnical assessment of the rock slopes above Skagway's cruise ship dock (Brennan and Whistler, 2022). High angle joints are likely formed by the tensile component of shearing from the nearby Chatham Strait fault and Eastern Denali fault systems, while sheeting joints reflect the combined influence of far field tectonic stresses and topographic stress that arise from landscape curvature (Martel, 2006, 2017). Rock slopes with orthogonal jointing are often predisposed to block toppling failure particularly where steep orthogonal joints form the sides of toppling blocks and low angle joints, like the sheeting joints observed in this study, act as the basal failure plane (Wyllie and Mah, 2004). Because the densest cluster of joints we observed dips steeply to the southeast, rock slopes facing northwest tend to form anti-dip slopes which are conducive to toppling failure. This is supported by larger and more abundant talus deposits on the east sides of the lower Skagway River valley and Nahku bay, confirming that rockfall occurs preferentially on northwest-facing slopes (Fig. 6).

The results of our kinematic analysis demonstrate that rock slopes in the steep rugged terrain surrounding Skagway are more susceptible to block toppling failure than planar slide failure. The preference for toppling failure is due to the inclination of joints, which are generally steep and conducive to toppling failure as their near verticality may preclude them from daylighting in rock slope faces, a necessary condition for planar slide failure. On the west side of the lower Skagway River valley, an isolated zone of steep vertical cliffs is susceptible to planar slide failure as recent planar failures are evident, which release from sheeting joints and slide on joints steeply dipping southeast (Fig. 12).

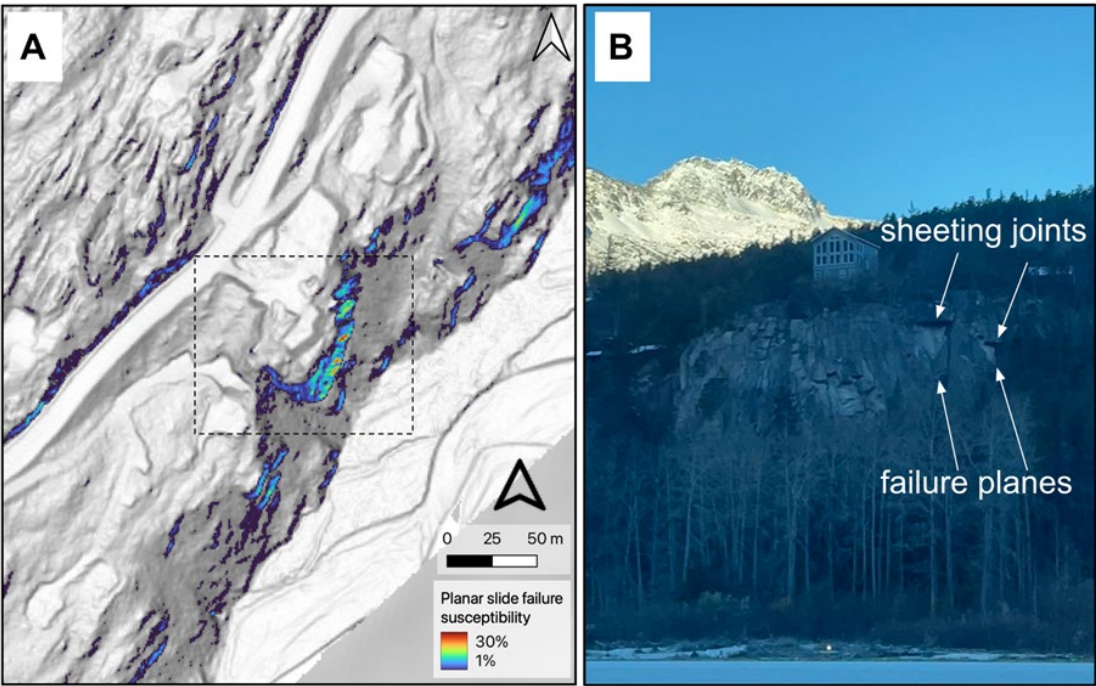

Figure 12: Planar sliding susceptibility along the western ridgeline in Skagway River Valley. Location depicted in Fig. 4. (a) Map of planar failure susceptibility index using equation 1. (b) Image of SE-facing ridgeline in lower Skagway River valley. Note high values on SE-facing steep bedrock cliffs that coincide with field evidence for sheeting joints and planar failures. Hillshades derived from DGGS lidar data.

Rockfall susceptibility maps are consistent with the failure mode and location of rock slope deformation observed in the field. Just uphill of the prominent escarpment along the eastern ridgeline in the lower Skagway River valley, we observed numerous instances of detached parallel slabs of rock separated by tension cracks (Fig. 3). These blocks appear to be experiencing early phases of toppling failure as vegetation and other processes contribute to crack widening. These observations indicate that our predicted zones of toppling failure along active bedrock escarpments are likely to continue propagating to the southeast providing additional blocks available to initiate rockfall. More generally, these observations suggest that erosion and SE-oriented lateral migration of the eastern ridgeline has been substantial since the glacial retreat 10 to 12 kya. Reconstruction of the ridgeline to its immediate post-glacial geometry implies that 10 to 100 meters of lateral erosion has occurred during the Holocene. On-going rockfall activity along this ridgeline suggests that this unravelling and retreat of the escarpment will continue.



Importantly, extensive rockfall activity and lateral divide migration does not occur along the entire ridgeline. Rather, our results show large sections of the 5-km long ridgeline with patchy and localized talus deposits and benchy bedrock landforms. On Kirmse's Cliff (at 4 km on the railroad transect), for example, talus deposits extend upslope from the valley floor to vertical cliff faces that terminate at the ridgeline (Fig. 5). In this area, rockfall susceptibility is relatively high, but concentrated in a relatively small area of vertical rock slope, and a forested talus deposit and benchy zone sits between the cliff and infrastructure in Skagway (Fig. 9). By contrast, several areas along the escarpment exhibit high potential for rockfall runout to reach the valley. At the cruise ship dock (4.5 to 5 km), continuous, rockfall-prone slopes above the cruise ship dock span from the escarpment to the base of the slope, resulting in a large area with high rockfall susceptibility in close proximity to harbour infrastructure. Similarly, from 1.5 to 2.5 km on our railroad transect, a high-relief escarpment with steep vertical bedrock outcrops near the crest exhibits a continuous steep slope to the valley floor (Fig. 10). In this area, which is the source area for the Cemetery Slide, rockfall susceptibility and long runout potential are high and we observed frequent spalling rocks during our field work (Fig. 10b). In addition, The Daily Alaskan reported a 1914 rockfall event just south of the Cemetery Slide at 2.5km along the transect which coincides with our simulations of high rockfall runout potential (Figs. 10 & 13). During that event, L. Gault noted “an avalanche of earth and stone” that “leaped the railroad track...pounding against the fence.” Gault noted that the railroad track served as a “safety barrier” because “the force of the descent had been so much lessened.” Further afield in the NE section of Nahku Bay, another zone of high rockfall susceptibility is revealed by our analysis. Steep rocky slopes rise to an elevation of 250 m with close proximity to Dyea Road. This area lacks a well-developed runout path, but it does coincide with source areas for two events in the AKDOT rockfall inventory that impacted Dyea Road. Most generally, a rigorous characterization of rockfall risk in Skagway requires estimation of occupation and usage of structures and transportation corridors coupled with our results (e.g., Michoud et al., 2012).

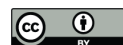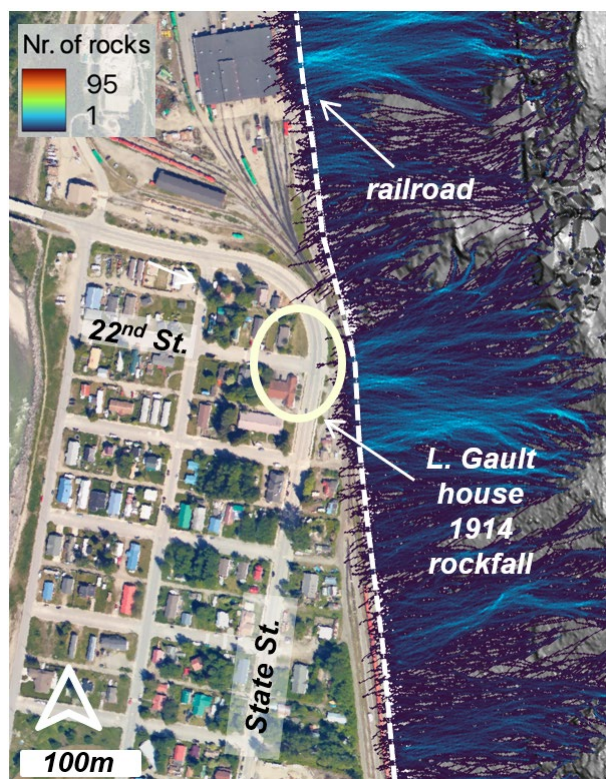

Figure 13: Detailed map of modeled rockfall runout (Medium rock (50<sup>th</sup> percentile), no forest) with location depicted shown by white box on Fig. 10b. Note the location of rockfall near the intersection of 22<sup>nd</sup> and State Street described by L. Gault in the March 26, 1914, edition of The Daily Alaskan. That location corresponds with a region of likely rockfall runout identified by our coupled initiation-runout simulations. Hillshade derived from DGGS lidar data. Background image from USGS NAIP (National Agriculture Imagery Program).

Our analyses reveal distinctive zones of high rockfall runout hazard in the Skagway region that result from the combination of glacial erosion that sets the morphology of bedrock slopes and the orientation of joint sets that determine the geometry of potential bedrock failures. Most likely, the orientation and extent of glacial erosion is not independent of the joints. Rather, we suspect that the nearly parallel orientation of joints and the N-NE trending ridgeline along the eastern margin of the lower Skagway River valley arise due to glacial erosion tracking discontinuities that facilitate erosion more readily than undeformed bedrock. Localized zones of the prominent ridgeline that abuts Skagway River valley exhibit abundant historic rockfall activity and over long timescales this activity is likely to continue. As such, our findings provide key constraints for identifying areas at risk to inform mitigation efforts.



## 6 Conclusions

Rock slope failure is a major driver of landscape evolution in Skagway since glacial retreat. The steeply dipping orthogonal joints in Skagway's rock slopes are conducive to block toppling failure. Our results highlight a distinct contrast in the morphology of Skagway River valley's eastern and western ridgelines, which is primarily determined by the predisposition of northwest-facing slopes to block toppling failure along a densely fractured joint set that dips steeply to the southeast. This is consistent with geomorphic evidence of extensive rockfall activity, where talus deposits are more abundant and larger on the eastern side of the lower Skagway River valley than the west. This structural control on rockfall activity is also reflected in the east and west sides of Nahku Bay, situated to the west of Skagway. Historic rockfall records indicate a similar preference for initiating on northwest-facing slopes. Our simulations show areas with high rockfall susceptibility that may merit further investigation and mitigation: 1) the ridgeline and slopes above the cruise ship dock, 2) the high-relief topography at the north end of Skagway (which includes the Cemetery Slide), and 3) the eastern ridgeline bordering Nahku Bay. Recent rockfall source areas located in these regions are characterized by steep northwest facing slopes that are highly susceptible to block toppling failure and reach >200 m in elevation which facilitates long runout paths.

## 7 Data availability

All topographic data used for analyses are cited within the text. The structural data are available as Supplemental material.

## 8 Author contribution

IW and JR conceived and designed the study and IW executed the study, RC provided on-site context, knowledge and guidance, AP contributed to study design and fieldwork, IW and JR prepared the manuscript with contributions from all other co-authors.

## 9 Acknowledgments

This research was funded by NSF Award #2052972 (Focused CoPe: Building Community Sensor Networks for Coastal Hazards and Climate Change Impacts in Southeast Alaska), which supports community-driven fundamental and translational geohazard science for project partners across SE Alaska. The authors thank leaders and members of the Skagway Traditional Council and residents of Skagway for their observations, critical insights, hospitality, and assistance; the Municipality of Skagway for sharing rockfall reports; and the NSF-funded UW RAPID facility for the timely acquisition of UAS lidar data. Conversations with Joe Wartman, Ben Leshchinsky, alex grant, Chris Massey, and Dimitrios Zekkos were insightful and contributed to our understanding of rockslope processes.





## 10 References

- Abellán, A., Calvet, J., Vilaplana, J. M., and Blanchard, J.: Detection and spatial prediction of rockfalls by means of terrestrial laser scanner monitoring, *Geomorphology*, 119, 162–171, <https://doi.org/10.1016/j.geomorph.2010.03.016>, 2010.
- Abellán, A., Vilaplana, J. M., Calvet, J., García-Sellés, D., and Asensio, E.: Rockfall monitoring by Terrestrial Laser Scanning – case study of the basaltic rock face at Castellfollit de la Roca (Catalonia, Spain), *Natural Hazards and Earth System Sciences*, 11, 829–841, <https://doi.org/10.5194/nhess-11-829-2011>, 2011.
- Aksoy, H. and Ercanoglu, M.: Determination of the rockfall source in an urban settlement area by using a rule-based fuzzy evaluation, *Natural Hazards and Earth System Sciences*, 6, 941–954, <https://doi.org/10.5194/nhess-6-941-2006>, 2006.
- Alejano, L. R., Veiga, M., Pérez-Rey, I., Castro-Filgueira, U., Arzúa, J., and Castro-Caicedo, Á. J.: Analysis of a complex slope failure in a granodiorite quarry bench, *Bull Eng Geol Environ*, 78, 1209–1224, <https://doi.org/10.1007/s10064-017-1160-y>, 2019.
- Baichtal, J. F., Lesnek, A. J., Carlson, R. J., Schmuck, N. S., Smith, J. L., Landwehr, D. J., and Briner, J. P.: Late Pleistocene and early Holocene sea-level history and glacial retreat interpreted from shell-bearing marine deposits of southeastern Alaska, USA, *Geosphere*, 17, 1590–1615, <https://doi.org/10.1130/GES02359.1>, 2021.
- Ballantyne, C. K.: A general model of paraglacial landscape response, *The Holocene*, 12, 371–376, <https://doi.org/10.1191/0959683602hl553fa>, 2002.
- Barlow, J., Lim, M., Rosser, N., Petley, D., Brain, M., Norman, E., and Geer, M.: Modeling cliff erosion using negative power law scaling of rockfalls, *Geomorphology*, 139–140, 416–424, <https://doi.org/10.1016/j.geomorph.2011.11.006>, 2012.
- Biegel, K. M., Gosselin, J. M., Dettmer, J., Colpron, M., Enkelmann, E., and Caine, J. S.: Earthquake Relocations Delineate a Discrete Fault Network and Deformation Corridor Throughout Southeast Alaska and Southwest Yukon, *Tectonics*, 43, e2023TC008140, <https://doi.org/10.1029/2023TC008140>, 2024.
- Borella, J., Quigley, M., Krauss, Z., Lincoln, K., Attanayake, J., Stamp, L., Lanman, H., Levine, S., Hampton, S., and Gravley, D.: Geologic and geomorphic controls on rockfall hazard: how well do past rockfalls predict future distributions?, *Natural Hazards and Earth System Sciences*, 19, 2249–2280, <https://doi.org/10.5194/nhess-19-2249-2019>, 2019.
- Bovis, M. J. and Evans, S. G.: Extensive deformations of rock slopes in southern Coast Mountains, southwest British Columbia, Canada, *Engineering Geology*, 44, 163–182, [https://doi.org/10.1016/S0013-7952\(96\)00068-3](https://doi.org/10.1016/S0013-7952(96)00068-3), 1996.
- Brennan, K. and Whistler, R.: Railroad dock landslide, initial site visit trip report, Skagway, Alaska, Geotechnical/Environmental Report, No. 109508-001, Shannon & Wilson, Anchorage, AK, USA, 2022.
- Burns, W. J. and Madin, I. P.: Protocol for Inventory Mapping of Landslide Deposits from Light Detection and Ranging (lidar) Imagery, Oregon Department of Geology and Mineral Industries (DOGAMI) Special Paper 42, 36p., 2009.
- Callahan and Wayland: Geologic reconnaissance of the West Creek damsite near Skagway, Alaska, *Geological Survey Bulletin*, 1211-A, <https://doi.org/10.3133/b1211A>, 1965.
- Caviezel, A., Ringenbach, A., Demmel, S. E., Dinneen, C. E., Krebs, N., Bühler, Y., Christen, M., Meyrat, G., Stoffel, A., Hafner, E., Eberhard, L. A., Rickenbach, D. von, Simmler, K., Mayer, P., Niklaus, P. S., Birchler, T., Aebi, T., Cavigelli, L., Schaffner, M., Rickli, S., Schnetzler, C., Magno, M., Benini, L., and Bartelt, P.: The relevance of rock shape over mass—implications for rockfall hazard assessments, *Nat Commun*, 12, 5546, <https://doi.org/10.1038/s41467-021-25794-y>, 2021.



- 675 Choi, M., Eaton, D. W., and Enkelmann, E.: Is the Eastern Denali fault still active?, *Geology*, 49, 662–666,  
676 <https://doi.org/10.1130/G48461.1>, 2021.
- 677 Collins, B. D. and Stock, G. M.: Rockfall triggering by cyclic thermal stressing of exfoliation fractures, *Nature Geoscience*, 9,  
678 395–400, <https://doi.org/10.1038/ngeo2686>, 2016.
- 679 Corominas, J., van Westen, C., Frattini, P., Cascini, L., Malet, J.-P., Fotopoulou, S., Catani, F., Van Den Eeckhaut, M.,  
680 Mavrouli, O., Agliardi, F., Pitilakis, K., Winter, M. G., Pastor, M., Ferlisi, S., Tofani, V., Hervás, J., and Smith, J. T.:  
681 Recommendations for the quantitative analysis of landslide risk, *Bull Eng Geol Environ*, 73, 209–263,  
682 <https://doi.org/10.1007/s10064-013-0538-8>, 2014.
- 683 Cruden, D. M.: Limits to common toppling, *Can. Geotech. J.*, 26, 737–742, <https://doi.org/10.1139/t89-085>, 1989.
- 684 DGGS Staff: LiDAR Datasets of Alaska, Alaska Division of Geological & Geophysical Surveys,  
685 <https://doi.org/10.14509/25239>, 2013.
- 686 Fanos, A. and Pradhan, B.: Laser Scanning Systems and Techniques in Rockfall Source Identification and Risk Assessment:  
687 A Critical Review, *Earth Systems and Environment*, 2, <https://doi.org/10.1007/s41748-018-0046-x>, 2018.
- 688 Frattini, P., Crosta, G., Carrara, A., and Agliardi, F.: Assessment of rockfall susceptibility by integrating statistical and  
689 physically-based approaches, *Geomorphology*, 94, 419–437, <https://doi.org/10.1016/j.geomorph.2006.10.037>, 2008.
- 690 Gigli, G., Lombardi, L., Carlà, T., Beni, T., and Casagli, N.: A method for full three-dimensional kinematic analysis of steep  
691 rock walls based on high-resolution point cloud data, *International Journal of Rock Mechanics and Mining Sciences*, 157,  
692 105178, <https://doi.org/10.1016/j.ijrmms.2022.105178>, 2022.
- 693 Grant, A., Wartman, J., and Abou-Jaoude, G.: Multimodal method for coseismic landslide hazard assessment, *Engineering*  
694 *Geology*, 212, 146–160, <https://doi.org/10.1016/j.enggeo.2016.08.005>, 2016.
- 695 Guerriero, L., Annibali Corona, M., Di Martire, D., Francioni, M., Limongiello, M., Tufano, R., and Calcaterra, D.: Rockfall  
696 susceptibility analysis of the “San Michele Arcangelo” historic trail (Central Italy) based on virtual outcrops and multiple  
697 propagation models, *Bull Eng Geol Environ*, 83, 263, <https://doi.org/10.1007/s10064-024-03764-0>, 2024.
- 698 Guzzetti, F., Reichenbach, P., and Wieczorek, G. F.: Rockfall hazard and risk assessment in the Yosemite Valley, California,  
699 USA, *Natural Hazards and Earth System Sciences*, 3, 491–503, <https://doi.org/10.5194/nhess-3-491-2003>, 2003.
- 700 Hales, T. C. and Roering, J. J.: Climatic controls on frost cracking and implications for the evolution of bedrock landscapes,  
701 *Journal of Geophysical Research*, 112, <https://doi.org/10.1029/2006JF000616>, 2007.
- 702 Hungr, O., Evans, S. G., and Hazzard, J.: Magnitude and frequency of rock falls and rock slides along the main transportation  
703 corridors of southwestern British Columbia, *Can. Geotech. J.*, 36, 224–238, <https://doi.org/10.1139/t98-106>, 1999.
- 704 Hungr, O., Leroueil, S., and Picarelli, L.: The Varnes classification of landslide types, an update, *Landslides*, 11, 167–194,  
705 <https://doi.org/10.1007/s10346-013-0436-y>, 2014.
- 706 Kundu, J., Sarkar, K., Ghaderpour, E., Mugnozza, G. S., and Mazzanti, P.: A GIS-Based Kinematic Analysis for Jointed Rock  
707 Slope Stability: An Application to Himalayan Slopes, *Land*, 12, <https://doi.org/10.3390/land12020402>, 2023.
- 708 Leine, R. I., Schweizer, A., Christen, M., Glover, J., Bartelt, P., and Gerber, W.: Simulation of rockfall trajectories with  
709 consideration of rock shape, *Multibody Syst Dyn*, 32, 241–271, <https://doi.org/10.1007/s11044-013-9393-4>, 2014.



- 710 Leith, K., Moore, J. R., Amann, F., and Loew, S.: In situ stress control on microcrack generation and macroscopic extensional  
711 fracture in exhuming bedrock: FRACTURE GENERATION IN EXHUMING BEDROCK, *Journal of Geophysical Research:*  
712 *Solid Earth*, 119, 594–615, <https://doi.org/10.1002/2012JB009801>, 2014.
- 713 Loye, A., Jaboyedoff, M., and Pedrazzini, A.: Identification of potential rockfall source areas at a regional scale using a DEM-  
714 based geomorphometric analysis, *Nat. Hazards Earth Syst. Sci.*, 9, 1643–1653, <https://doi.org/10.5194/nhess-9-1643-2009>,  
715 2009.
- 716 Lu, G., Caviezel, A., Christen, M., Demmel, S. E., Ringenbach, A., Bühler, Y., Dinneen, C. E., Gerber, W., and Bartelt, P.:  
717 Modelling rockfall impact with scarring in compactable soils, *Landslides*, 16, 2353–2367, [https://doi.org/10.1007/s10346-019-](https://doi.org/10.1007/s10346-019-01238-z)  
718 01238-z, 2019.
- 719 Lu, G., Ringenbach, A., Caviezel, A., Sanchez, M., Christen, M., and Bartelt, P.: Mitigation effects of trees on rockfall hazards:  
720 does rock shape matter?, *Landslides*, 18, 59–77, <https://doi.org/10.1007/s10346-020-01418-2>, 2021.
- 721 Luckman, B. H.: Rockfalls and rockfall inventory data: Some observations from surprise valley, Jasper National Park, Canada,  
722 *Earth Surface Processes*, 1, 287–298, <https://doi.org/10.1002/esp.3290010309>, 1976.
- 723 Macpherson, A. E., Nicolsky, D. J., and Suleimani, E. N.: Digital elevation models of Skagway and Haines, Alaska:  
724 Procedures, data sources, and quality assessment, *Alaska Division of Geological & Geophysical Surveys*,  
725 <https://doi.org/10.14509/29143>, 2014.
- 726 Marquínez, J., Menéndez Duarte, R., Farias, P., and Jiménez Sánchez, M.: Predictive GIS-Based Model of Rockfall Activity  
727 in Mountain Cliffs, *Natural Hazards*, 30, 341–360, <https://doi.org/10.1023/B:NHAZ.0000007170.21649.e1>, 2003.
- 728 Martel, S. J.: Effect of topographic curvature on near-surface stresses and application to sheeting joints: EFFECT OF  
729 TOPOGRAPHIC CURVATURE, *Geophysical Research Letters*, 33, n/a-n/a, <https://doi.org/10.1029/2005GL024710>, 2006.
- 730 Martel, S. J.: Progress in understanding sheeting joints over the past two centuries, *Journal of Structural Geology*, 94, 68–86,  
731 <https://doi.org/10.1016/j.jsg.2016.11.003>, 2017.
- 732 Matasci, B., Stock, G. M., Jaboyedoff, M., Carrea, D., Collins, B. D., Guérin, A., Matasci, G., and Ravel, L.: Assessing  
733 rockfall susceptibility in steep and overhanging slopes using three-dimensional analysis of failure mechanisms, *Landslides*,  
734 15, 859–878, <https://doi.org/10.1007/s10346-017-0911-y>, 2018.
- 735 Matsuoka, N. and Sakai, H.: Rockfall activity from an alpine cliff during thawing periods, *Geomorphology*, 28, 309–328,  
736 [https://doi.org/10.1016/S0169-555X\(98\)00116-0](https://doi.org/10.1016/S0169-555X(98)00116-0), 1999.
- 737 Menounos, B., Goehring, B. M., Osborn, G., Margold, M., Ward, B., Bond, J., Clarke, G. K. C., Clague, J. J., Lakerman, T.,  
738 Koch, J., Caffee, M. W., Gosse, J., Stroeven, A. P., Seguinot, J., and Heyman, J.: Cordilleran Ice Sheet mass loss preceded  
739 climate reversals near the Pleistocene Termination, *Science*, 358, 781–784, <https://doi.org/10.1126/science.aan3001>, 2017.
- 740 Messenzehl, K., Meyer, H., Otto, J.-C., Hoffmann, T., and Dikau, R.: Regional-scale controls on the spatial activity of rockfalls  
741 (Turtmann Valley, Swiss Alps) — A multivariate modeling approach, *Geomorphology*, 287, 29–45,  
742 <https://doi.org/10.1016/j.geomorph.2016.01.008>, 2017.
- 743 Michoud, C., Derron, M.-H., Horton, P., Jaboyedoff, M., Baillifard, F.-J., Loye, A., Nicolet, P., Pedrazzini, A., and Queyrel,  
744 A.: Rockfall hazard and risk assessments along roads at a regional scale: example in Swiss Alps, *Natural Hazards and Earth*  
745 *System Sciences*, 12, 615–629, <https://doi.org/10.5194/nhess-12-615-2012>, 2012.





- 746 Moore, J. R., Sanders, J. W., Dietrich, W. E., and Glaser, S. D.: Influence of rock mass strength on the erosion rate of alpine  
747 cliffs, *Earth Surface Processes and Landforms*, 34, 1339–1352, <https://doi.org/10.1002/esp.1821>, 2009.
- 748 Moos, C., Khelidj, N., Guisan, A., Lischke, H., and Randin, C. F.: A quantitative assessment of rockfall influence on forest  
749 structure in the Swiss Alps, *Eur J Forest Res*, 140, 91–104, <https://doi.org/10.1007/s10342-020-01317-0>, 2021.
- 750 Munson, M.: Railroad Dock landslides continue, declaration of emergency in place, *The Skagway News*, 12th August, 2022a.
- 751 Munson, M.: Rockslide at cruise ship dock – Skagway’s Railroad Dock has limited use, *The Skagway News*, 23rd June, 2022b.
- 752 Nash, D., Rutz, J. J., and Jacobs, A.: Atmospheric Rivers in Southeast Alaska: Meteorological Conditions Associated With  
753 Extreme Precipitation, *Journal of Geophysical Research: Atmospheres*, 129, e2023JD039294,  
754 <https://doi.org/10.1029/2023JD039294>, 2024.
- 755 Oliinyk, M., Bubniak, I., and Vikhot, Y.: Using Move software by geological field works, *International Conference of Young  
756 Professionals «GeoTerrace-2020»*, 1–5, <https://doi.org/10.3997/2214-4609.20205706>, 2020.
- 757 Patton, A. I., Luna, L. V., Roering, J. J., Jacobs, A., Korup, O., and Mirus, B. B.: Landslide initiation thresholds in data-sparse  
758 regions: application to landslide early warning criteria in Sitka, Alaska, USA, *Natural Hazards and Earth System Sciences*, 23,  
759 3261–3284, <https://doi.org/10.5194/nhess-23-3261-2023>, 2023.
- 760 Poage, N. J., Marshall, D. D., and McClellan, M. H.: Maximum Stand-Density Index of 40 Western Hemlock–Sitka Spruce  
761 Stands in Southeast Alaska, *Western Journal of Applied Forestry*, 22, 99–104, <https://doi.org/10.1093/wjaf/22.2.99>, 2007.
- 762 Priest, S. D. and Hudson, J. A.: Estimation of discontinuity spacing and trace length using scanline surveys, *International  
763 Journal of Rock Mechanics and Mining Sciences & Geomechanics Abstracts*, 18, 183–197, [https://doi.org/10.1016/0148-9062\(81\)90973-6](https://doi.org/10.1016/0148-9062(81)90973-6), 1981.
- 765 Rapp, A.: Talus slopes and mountain walls at Tempelfjorden, Spitsbergen : a geomorphological study of the denudation of  
766 slopes in an Arctic locality, *Skritftr, Norsk Polarinstitut*, 119, 1960.
- 767 Roering, J. J., Dedinsky, K., Grilliot, M., Wachino, I. D., and Cash, R.: Skagway Landslide Hazard, RAPID Facility,  
768 <https://doi.org/doi.org/10.17603/ds2-2e3p-yn12>, 2025.
- 769 Rosser, N. and Massey, C.: Rockfall hazard and risk, in: *Landslide Hazards, Risks, and Disasters*, Elsevier, 581–622,  
770 <https://doi.org/10.1016/B978-0-12-818464-6.00013-5>, 2022.
- 771 Rosser, N., Lim, M., Petley, D., Dunning, S., and Allison, R.: Patterns of precursory rockfall prior to slope failure, *Journal of  
772 Geophysical Research: Earth Surface*, 112, <https://doi.org/10.1029/2006JF000642>, 2007.
- 773 Royán, M. J., Abellán, A., Jaboyedoff, M., Vilaplana, J. M., and Calvet, J.: Spatio-temporal analysis of rockfall pre-failure  
774 deformation using Terrestrial LiDAR, *Landslides*, 11, 697–709, <https://doi.org/10.1007/s10346-013-0442-0>, 2014.
- 775 Samodra, G., Chen, G., Sartohadi, J., Hadmoko, D. S., Kasama, K., and Setiawan, M. A.: Rockfall susceptibility zoning based  
776 on back analysis of rockfall deposit inventory in Gunung Kelir, Java, *Landslides*, 13, 805–819, <https://doi.org/10.1007/s10346-016-0713-7>, 2016.
- 778 Sarro, R., Rossi, M., Reichenbach, P., and Mateos, R. M.: From rockfall source areas identification to susceptibility zonation:  
779 a proposed workflow tested in El Hierro (Canary Islands, Spain), *Natural Hazards and Earth System Sciences Discussions*, 1–  
780 30, <https://doi.org/10.5194/nhess-2024-85>, 2024.



- 781 Stock, G. M. and Collins, B. D.: Quantitative Rockfall hazard and risk assessment for Yosemite Valley, Yosemite National  
782 Park, California, USGS Scientific Investigations Report 2014-5129, 2014.
- 783 Stock, G. M., Bawden, G. W., Green, J. K., Hanson, E., Downing, G., Collins, B. D., Bond, S., and Leslar, M.: High-resolution  
784 three-dimensional imaging and analysis of rock falls in Yosemite Valley, California, *Geosphere*, 7, 573–581,  
785 <https://doi.org/10.1130/GES00617.1>, 2011.
- 786 Terzaghi, R. D.: Sources of Error in Joint Surveys, *Géotechnique*, 15, 287–304, <https://doi.org/10.1680/geot.1965.15.3.287>,  
787 1965.
- 788 The Daily Alaskan: SLIDE: Hill again caves in near Moore’s Wharf, The Daily Alaskan, 20th October, 1, 1901.
- 789 Thompson, P.: Alaska Department of Transportation & Public Facilities (AKDOT) Geotechnical Asset Management Program,  
790 Technical Report STP000S(802)(B), Juneau, AK, 2017.
- 791 Thornton, T. F.: Our Grandparents’ Names on the Land/Haa Leelk’w Has Aani Saax’u, University of Washington Press,  
792 Seattle, WA, 256 pp., 2010.
- 793 Utlu, M., Öztürk, M. Z., Şimşek, M., and Akgümüş, M. F.: Evaluation of rockfall hazard based on UAV technology and 3D  
794 Rockfall Simulations, *International Journal of Environment and Geoinformatics*, 10, 1–16, <https://doi.org/doi.10.30897/ijegeo.10323768>, 2023.
- 796 Whalley, B.: Rockfalls, in: *Slope Instability*, Wiley, Chichester, UK, 217–256, 1984.
- 797 Wieczorek, G. F. and Jäger, S.: Triggering mechanisms and depositional rates of postglacial slope-movement processes in the  
798 Yosemite Valley, California, *Geomorphology*, 15, 17–31, [https://doi.org/10.1016/0169-555X\(95\)00112-I](https://doi.org/10.1016/0169-555X(95)00112-I), 1996.
- 799 Wright, B. E., Plumb, P., Wright, J., and Biles, F. E.: Historical photographs from U.S. Forest Service research and  
800 development activities in Alaska, <https://doi.org/10.2737/RDS-2021-0084>, 2021.
- 801 Wyllie, D. C. and Mah, C. W.: *Rock Slope Engineering*, 4th ed., Spon, 456 pp., 2004.
- 802 Yehle, L. A. and Lemke, R. W.: Reconnaissance engineering geology of the Skagway area, Alaska with emphasis on evaluation  
803 of earthquake and other geologic hazards, USGS Open File Report, 1972.
